# Supplementary material
Source: PubMed Central journal article supplement (PMC9475029)

Dear Editors,

Thank you very much for your information. Below are the original gel of western blots. Due to these western blots were obtained within three years, we cropped the blots at that time to cut cost. But we can guarantee the shown blots are correct, and do not affect the conclusion.

Best Regards

Yours Sincerely

Shihe Shao

Fig. 2H

MGC-803 cells

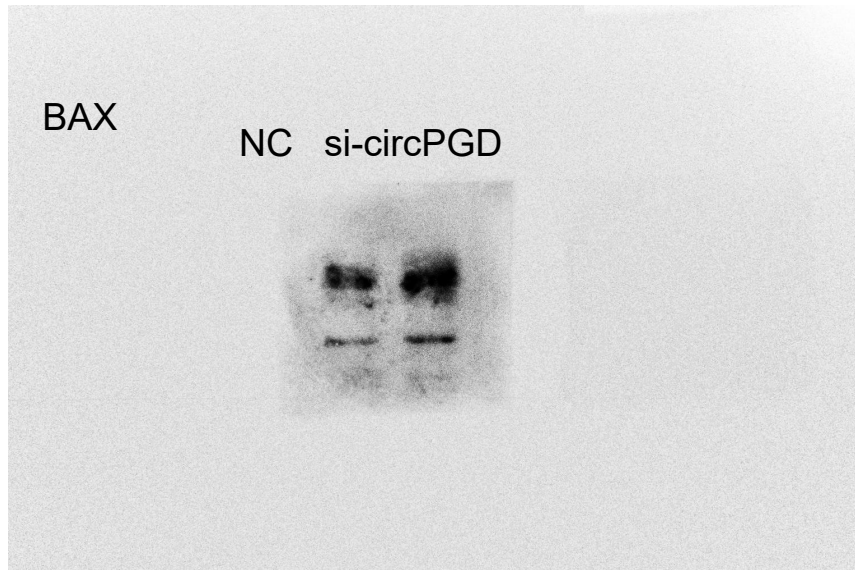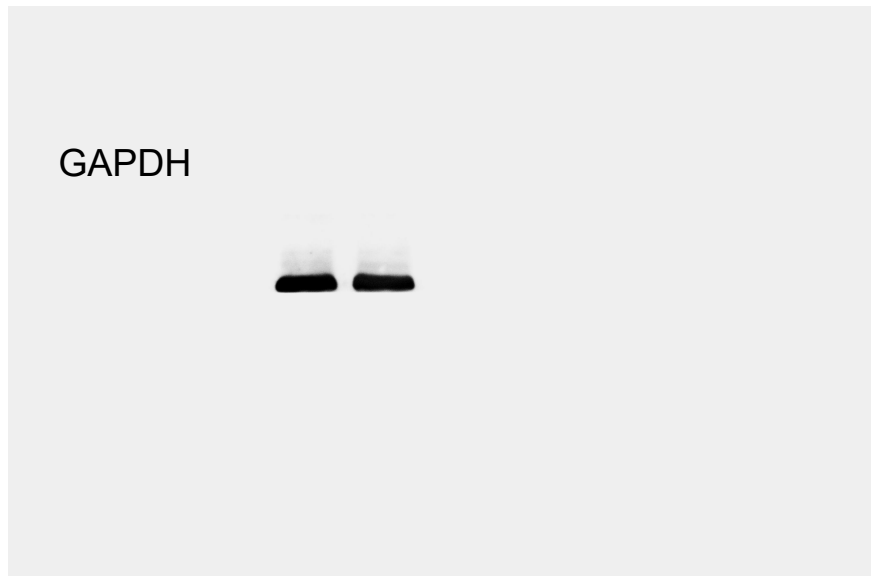

Fig. 2H BGC-823 cells

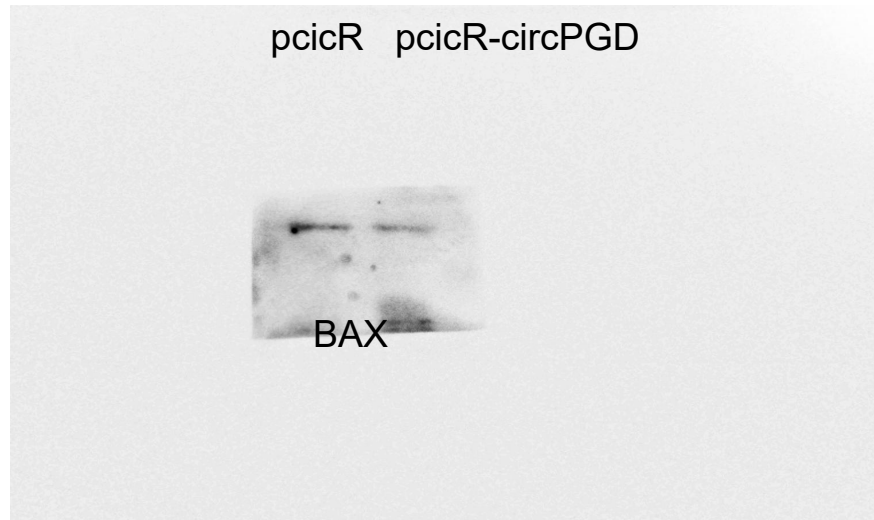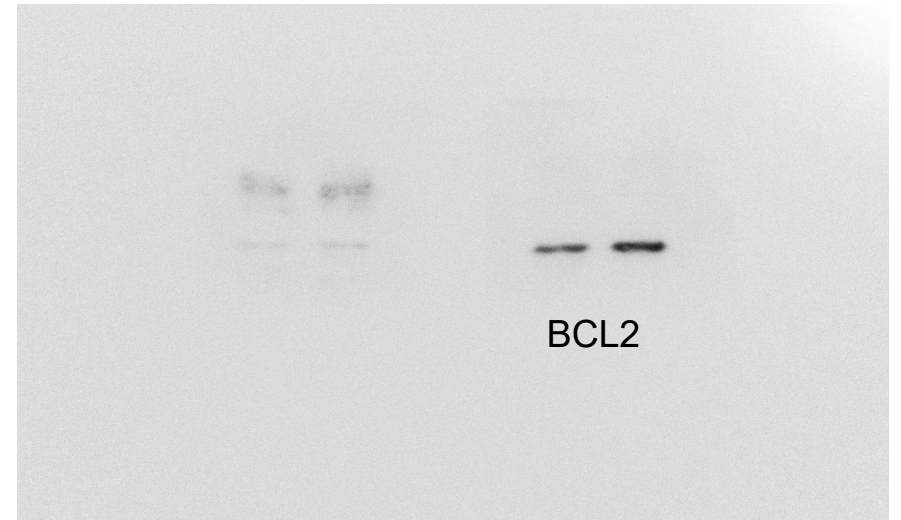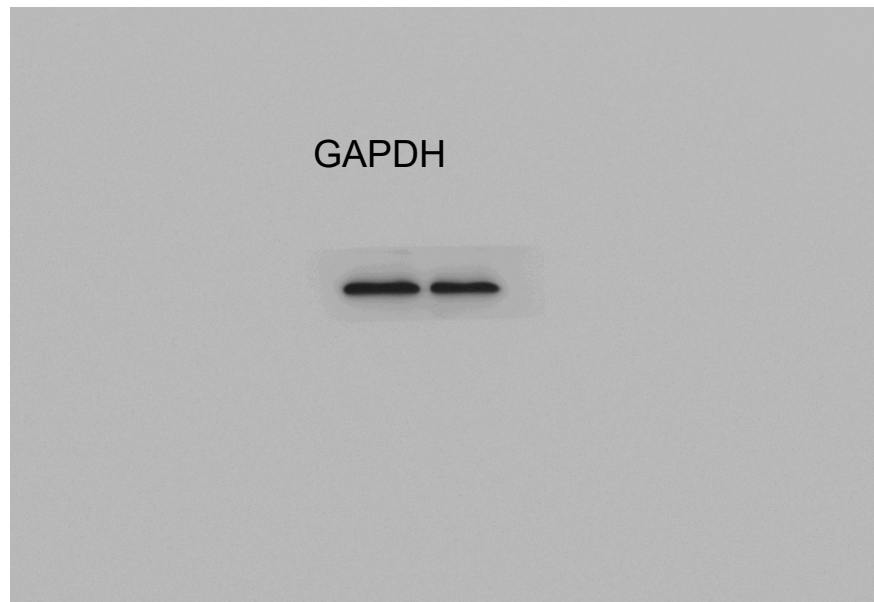

Fig. 2I MGC-803 cells

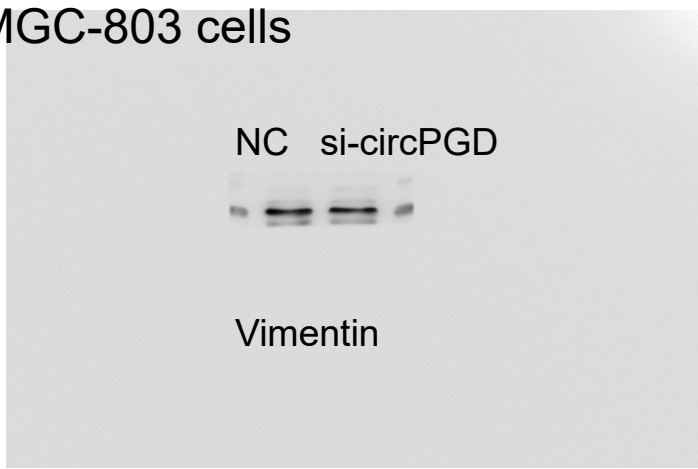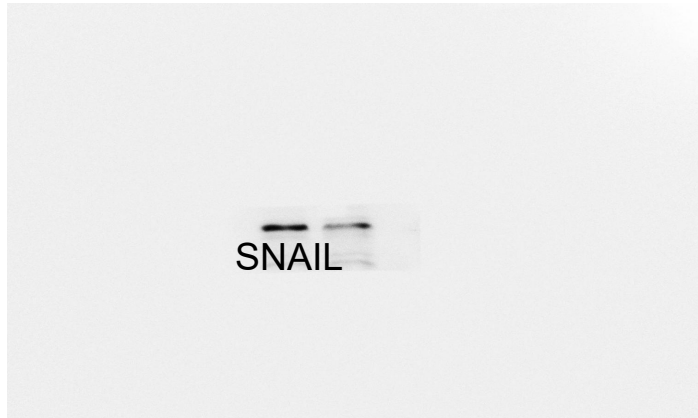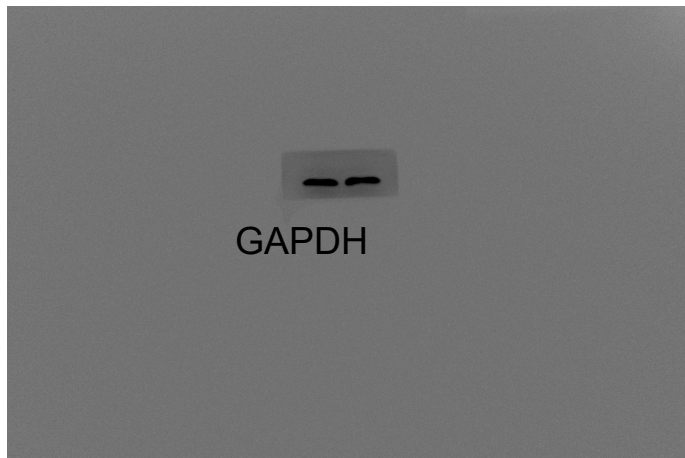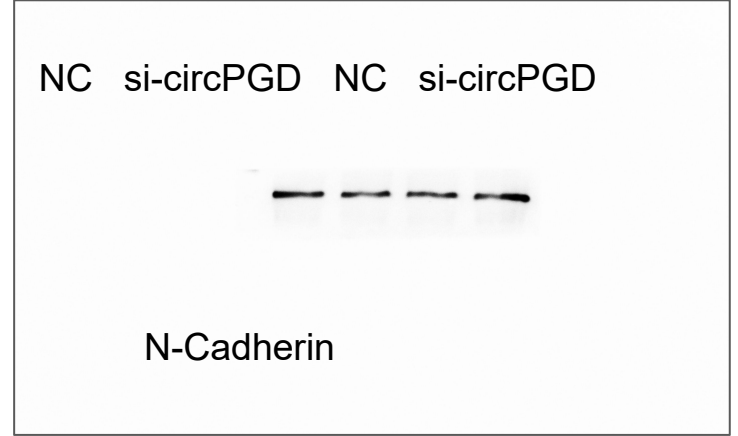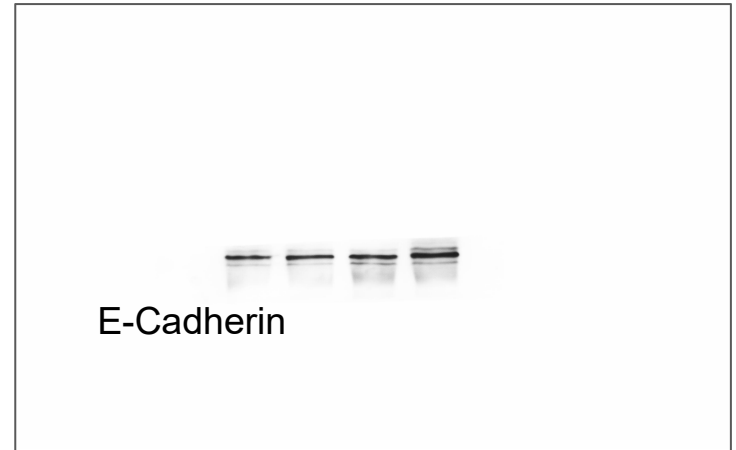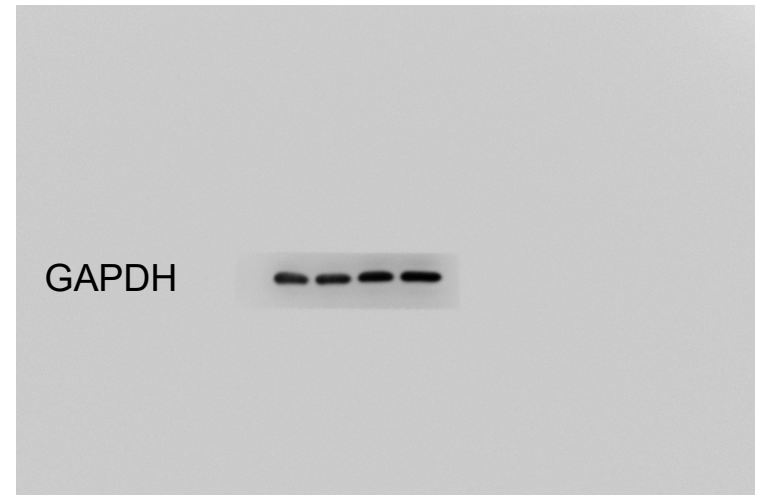

Fig. 2I BGC-823 cells

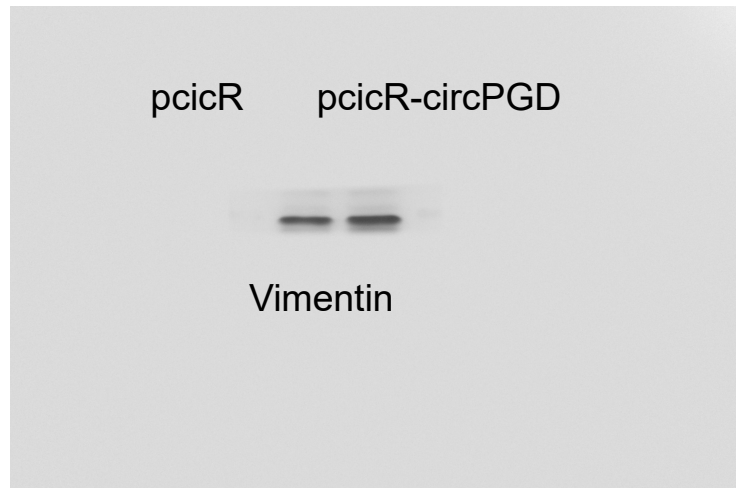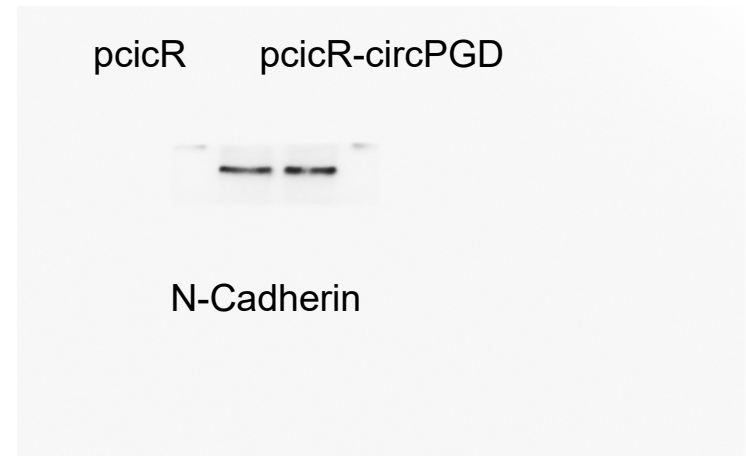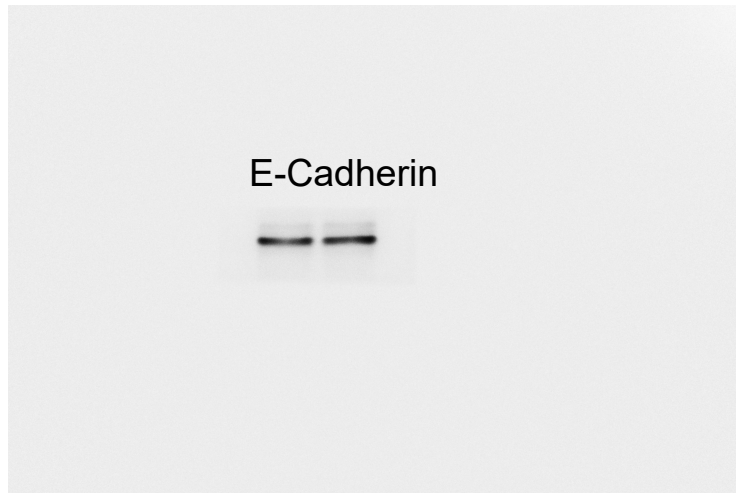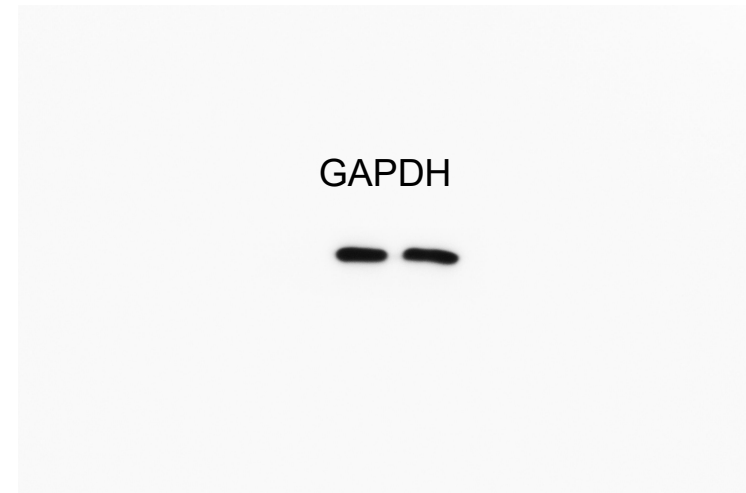

Fig. 2J MGC-803 cells

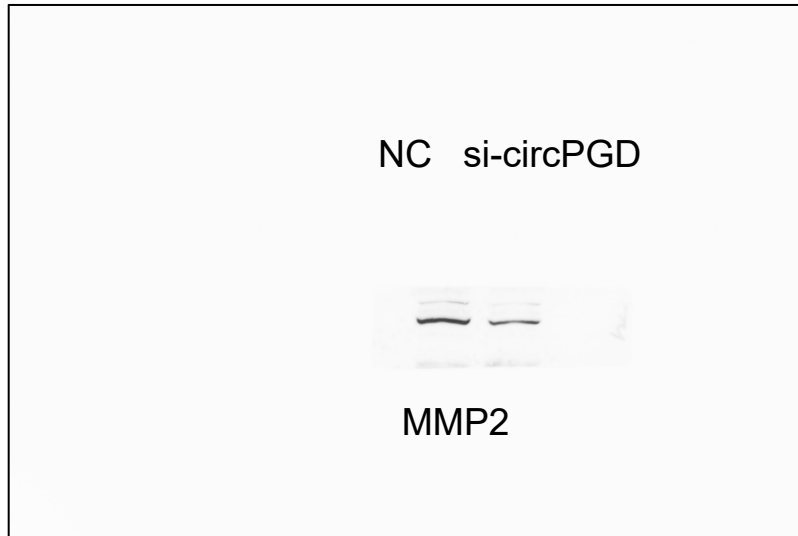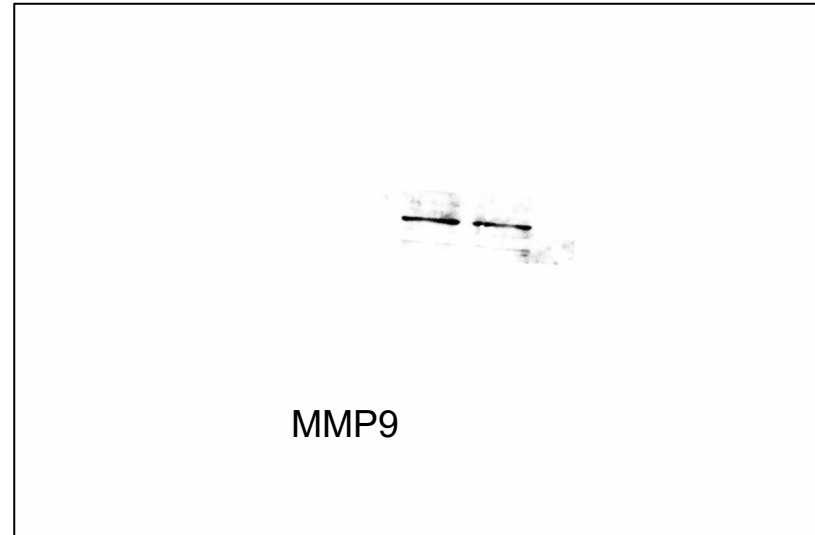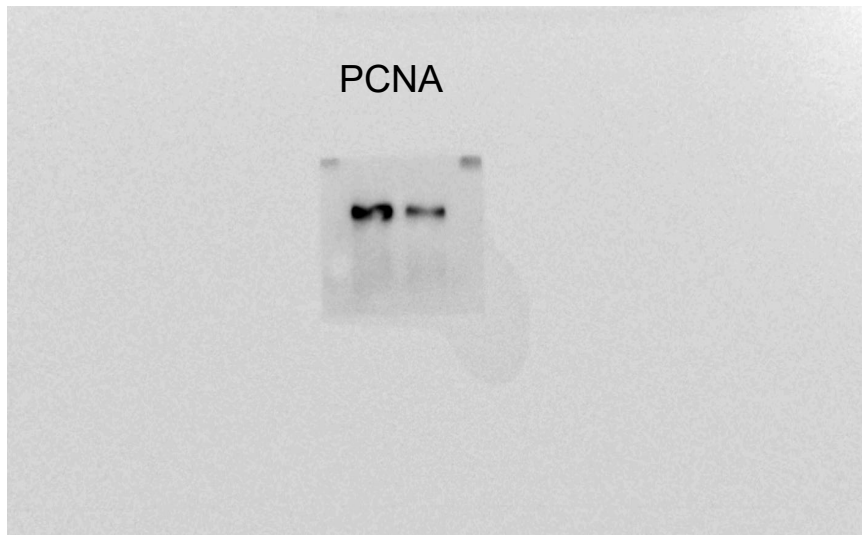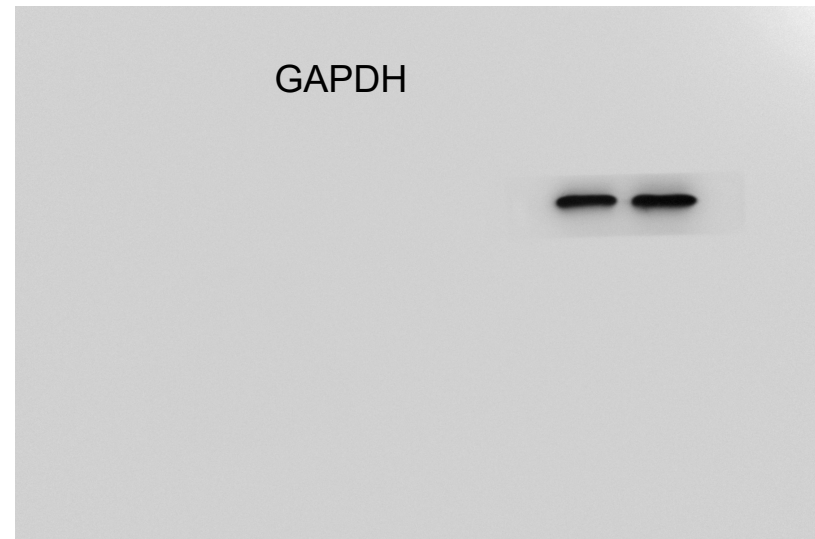

Fig. 2J BGC-823 cells

pcicR pcicR-circPGD

MMP2

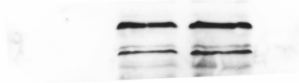

MMP9

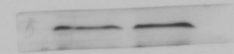

PCNA

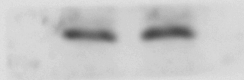

GAPDH

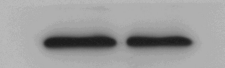

Fig. 2K MGC-803 cells

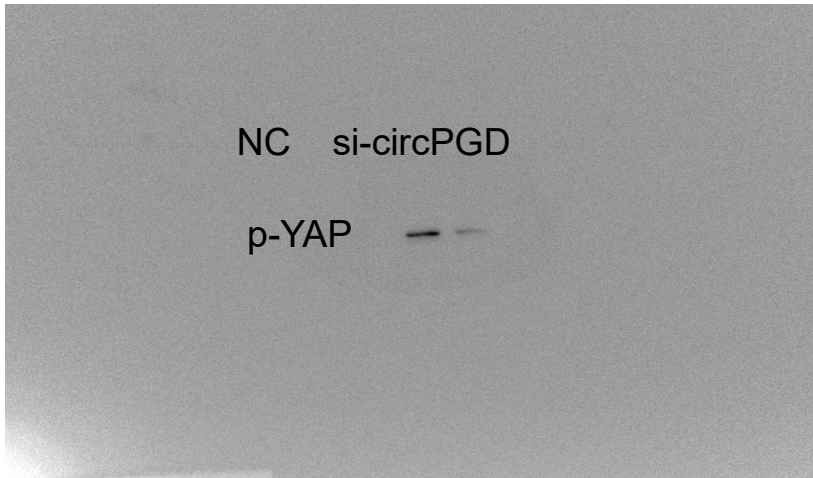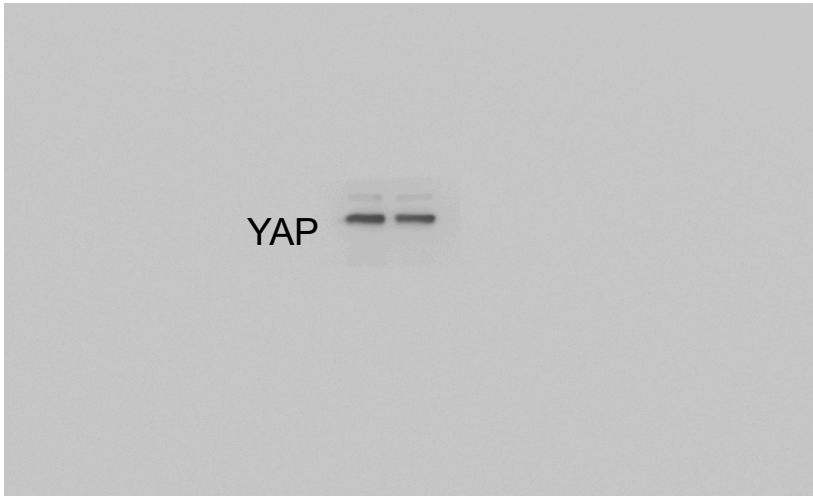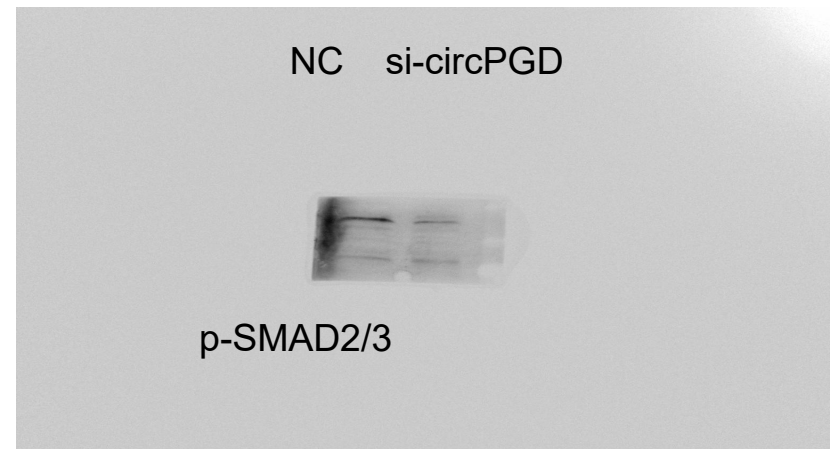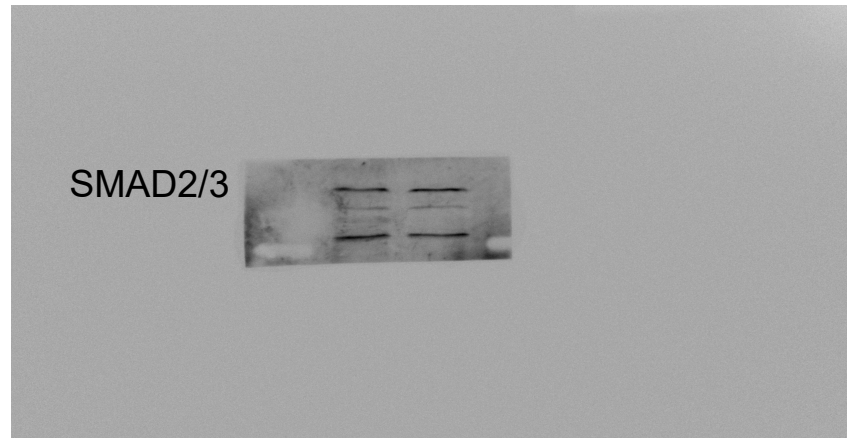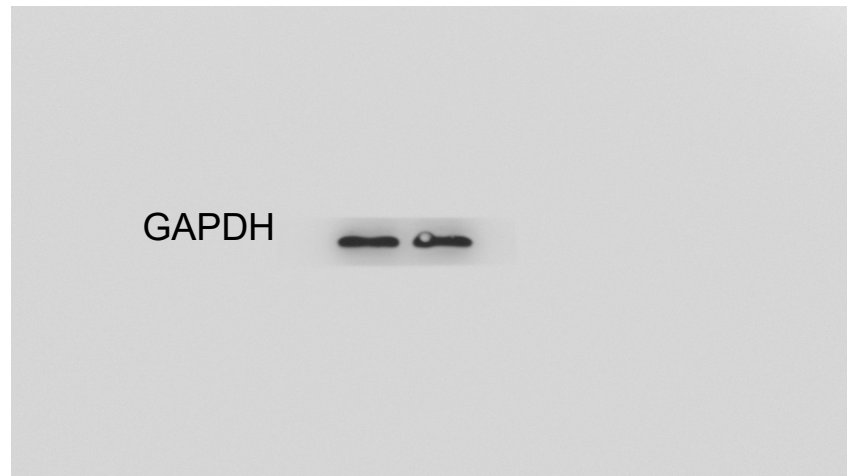



Fig. 2K BGC-823 cells

pcicR pcicR-circPGD

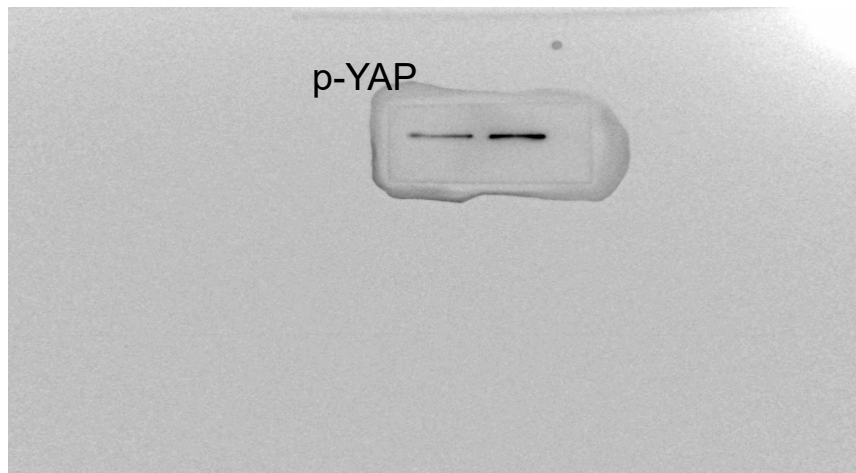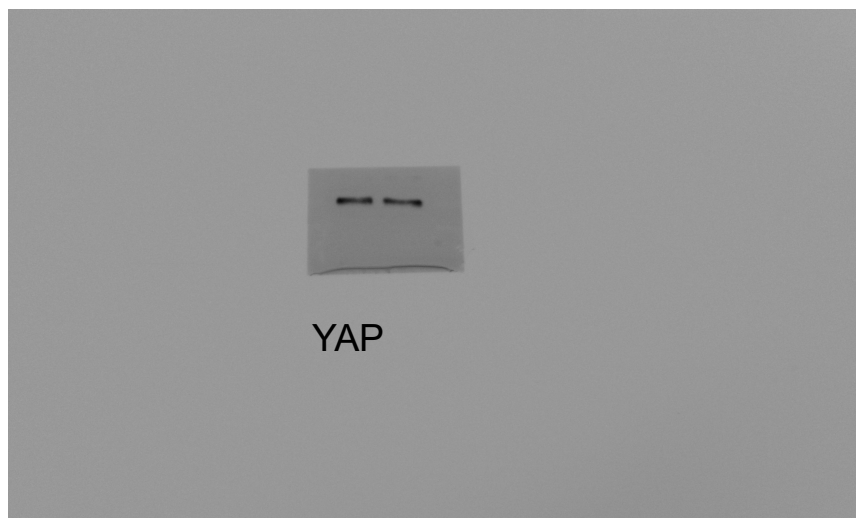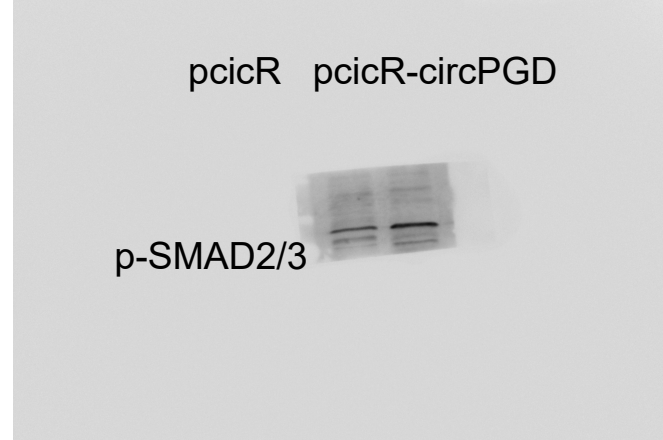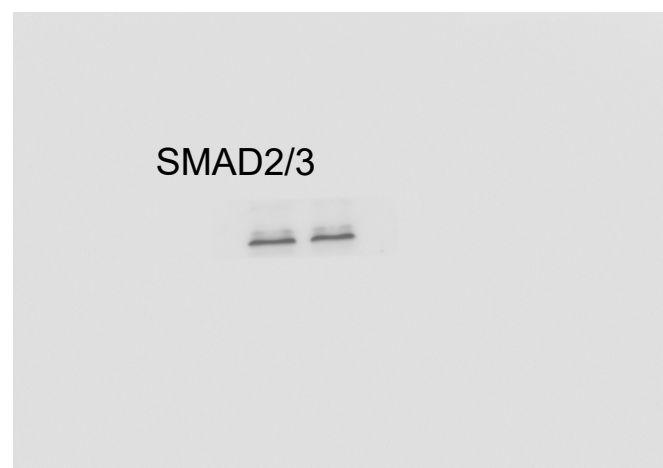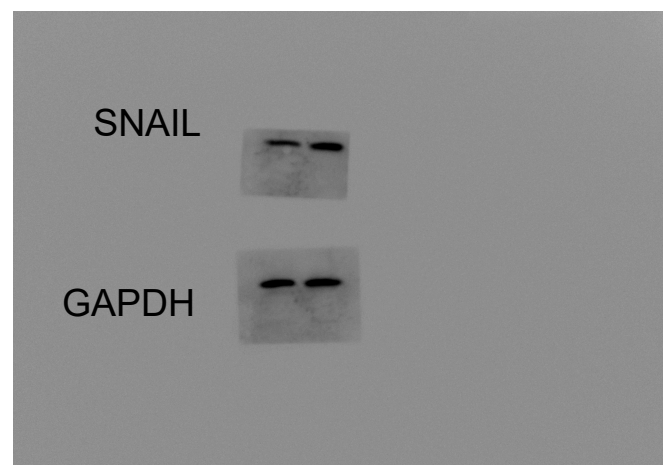

Fig. 4F

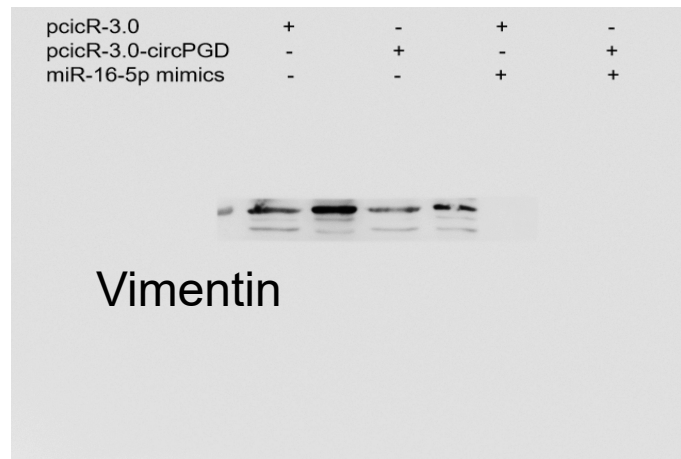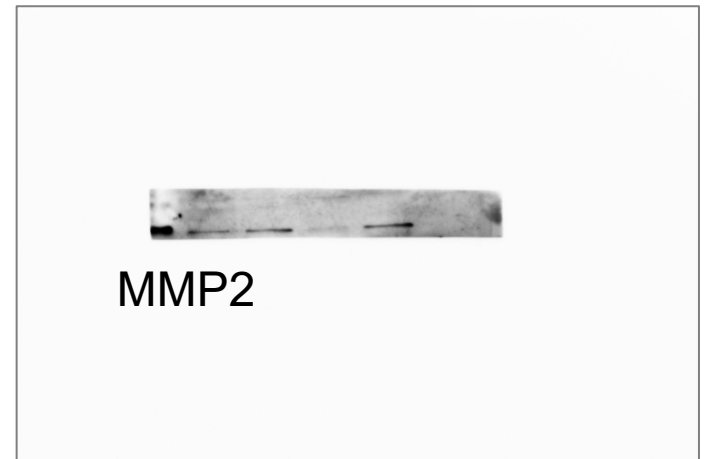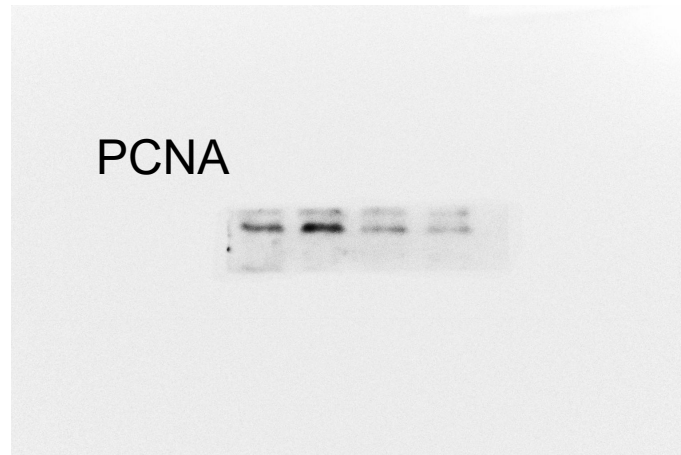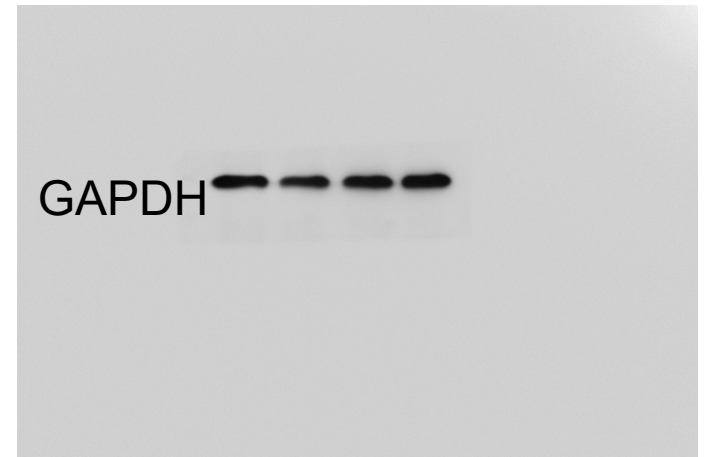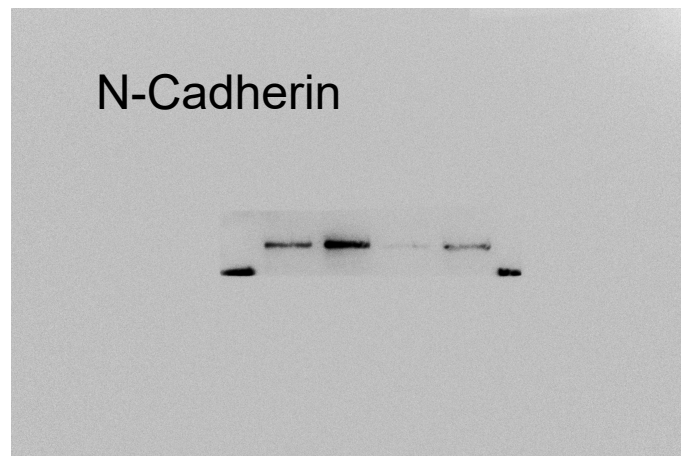

Fig. 4G

|                   |   |   |   |   |
|-------------------|---|---|---|---|
| pcicR-3.0         | + | - | + | - |
| pcicR-3.0-circPGD | - | + | - | + |
| miR-16-5p mimics  | - | - | + | + |

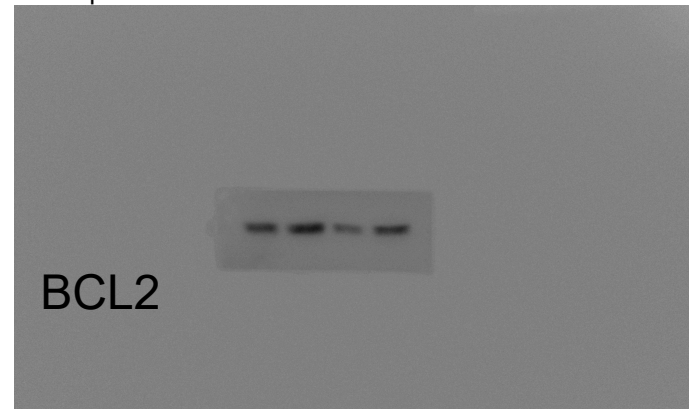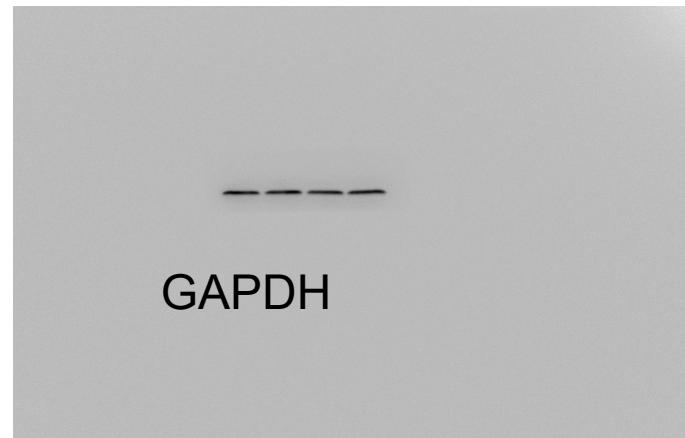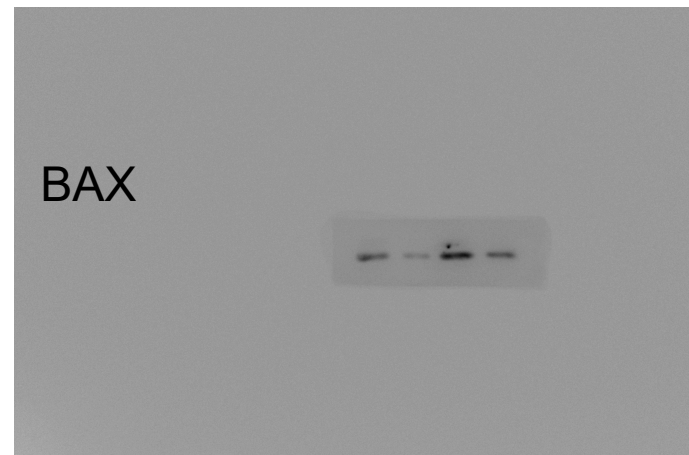

Fig. 4H

|                   |   |   |   |   |
|-------------------|---|---|---|---|
| pcicR-3.0         | + | - | + | - |
| pcicR-3.0-circPGD | - | + | - | + |
| miR-16-5p mimics  | - | - | + | + |

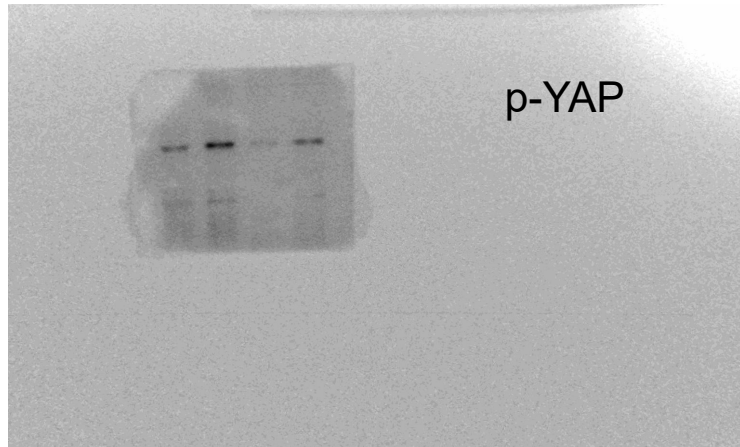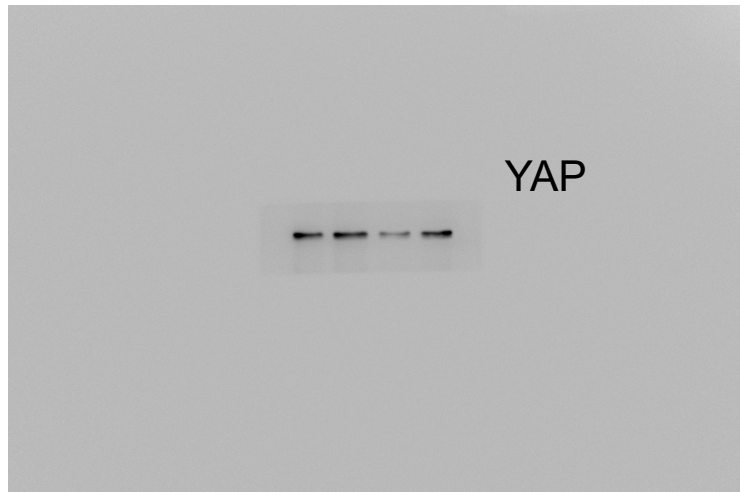

|                   |   |   |   |   |
|-------------------|---|---|---|---|
| pcicR-3.0         | + | - | + | - |
| pcicR-3.0-circPGD | - | + | - | + |
| miR-16-5p mimics  | - | - | + | + |

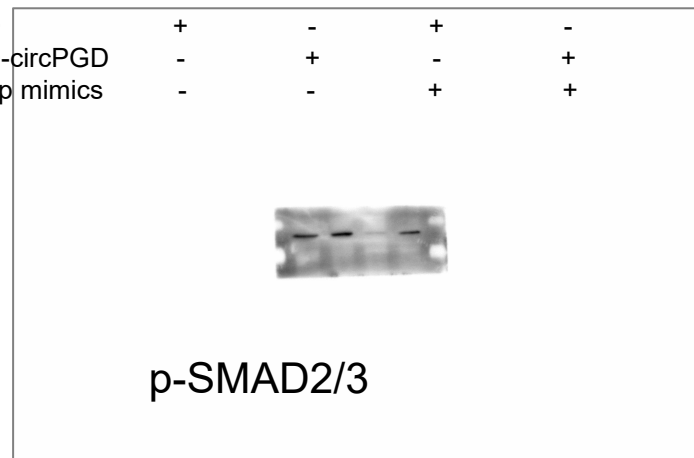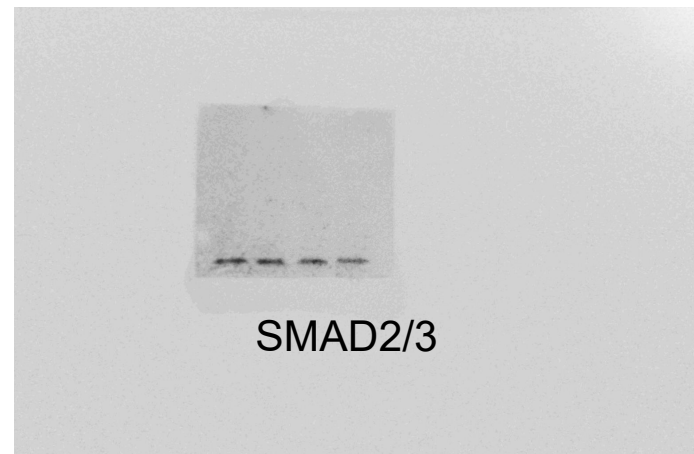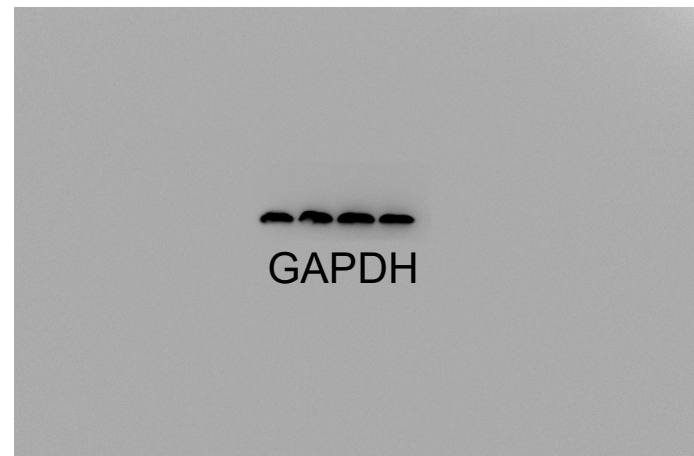

Fig. 4N

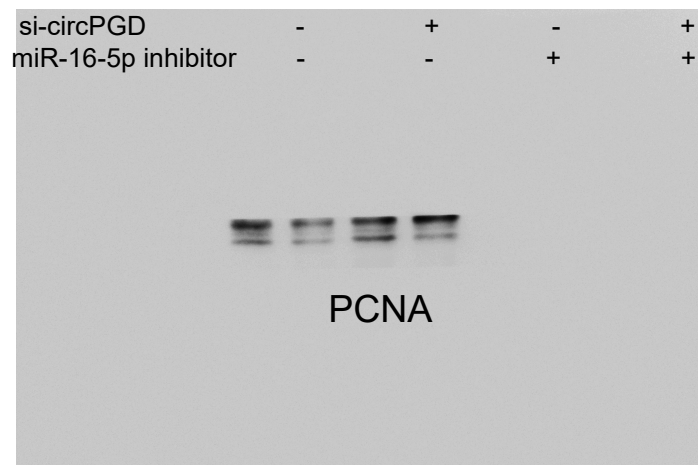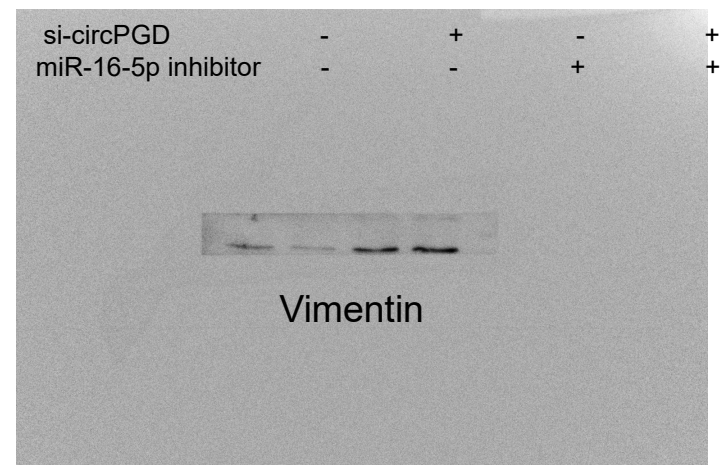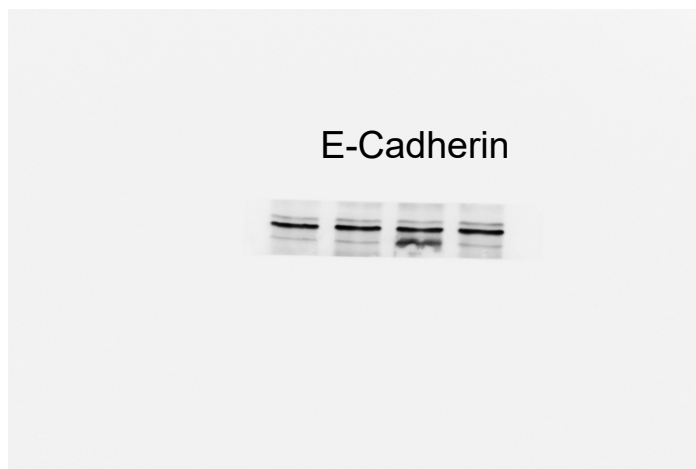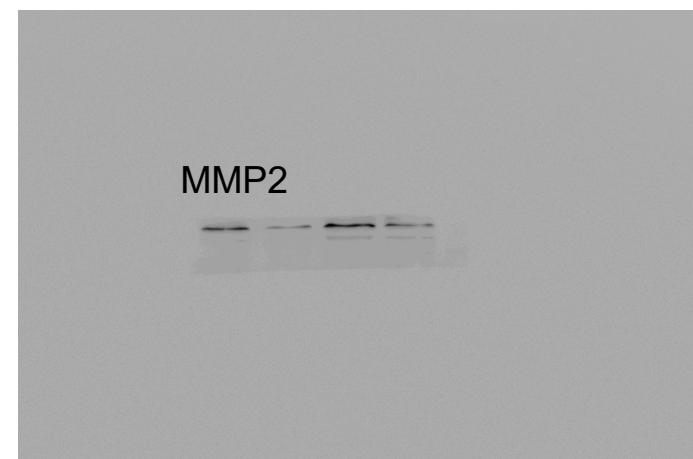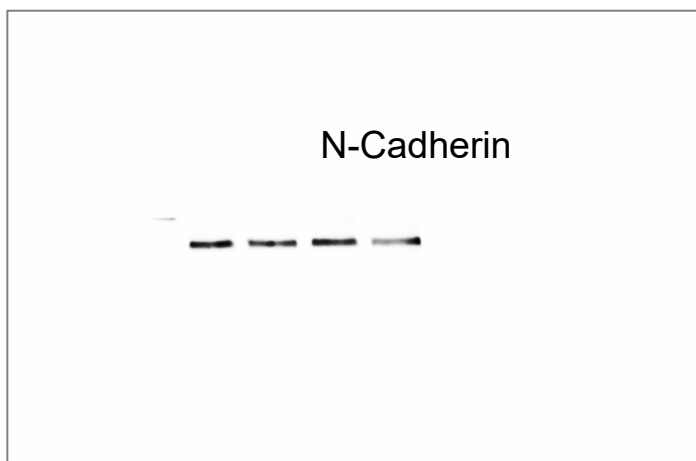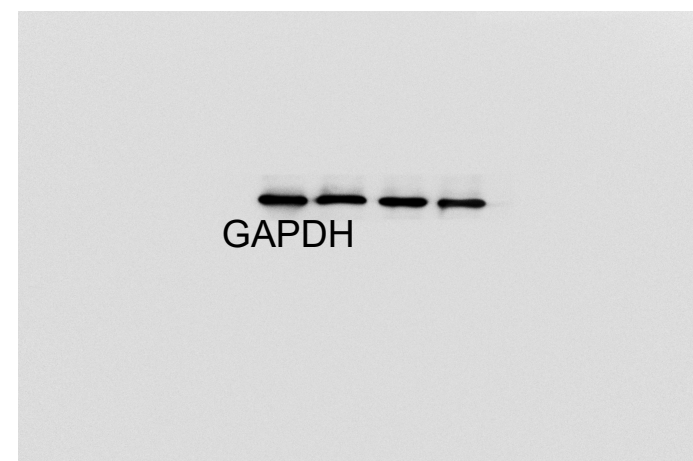

Fig. 4O

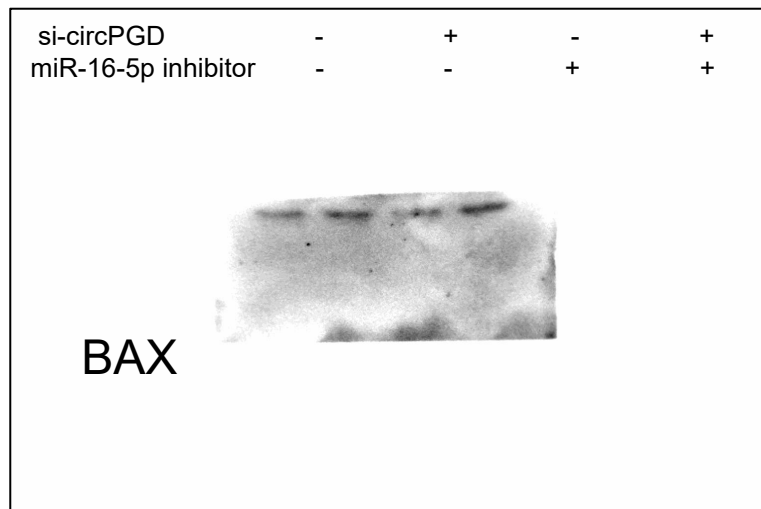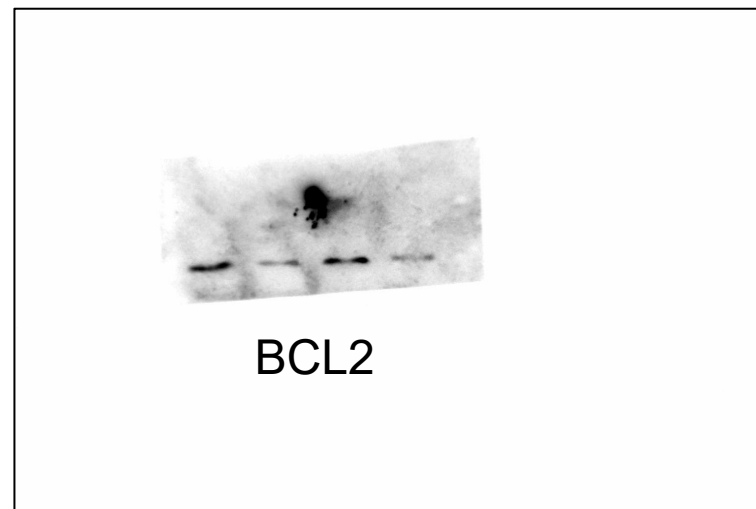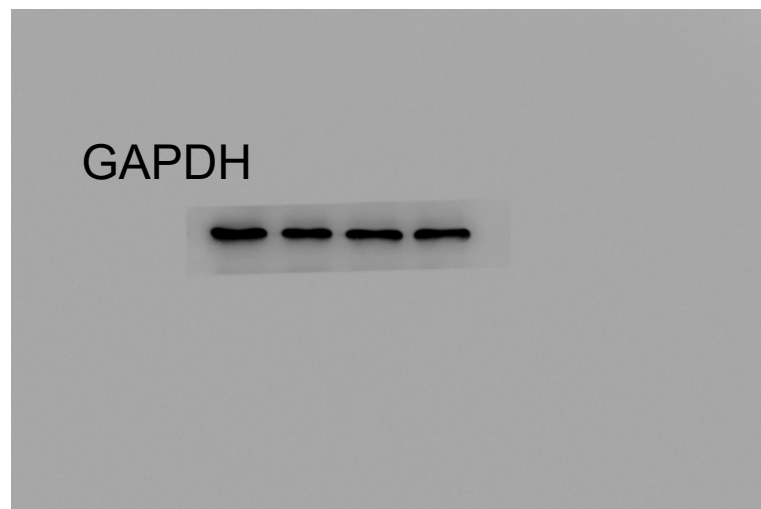

Fig. 4P

|                     |   |   |   |   |
|---------------------|---|---|---|---|
| si-circPGD          | - | + | - | + |
| miR-16-5p inhibitor | - | - | + | + |

SMAD2/3



YAP



p-SMAD2/3



p-YAP



GAPDH



Fig 5B

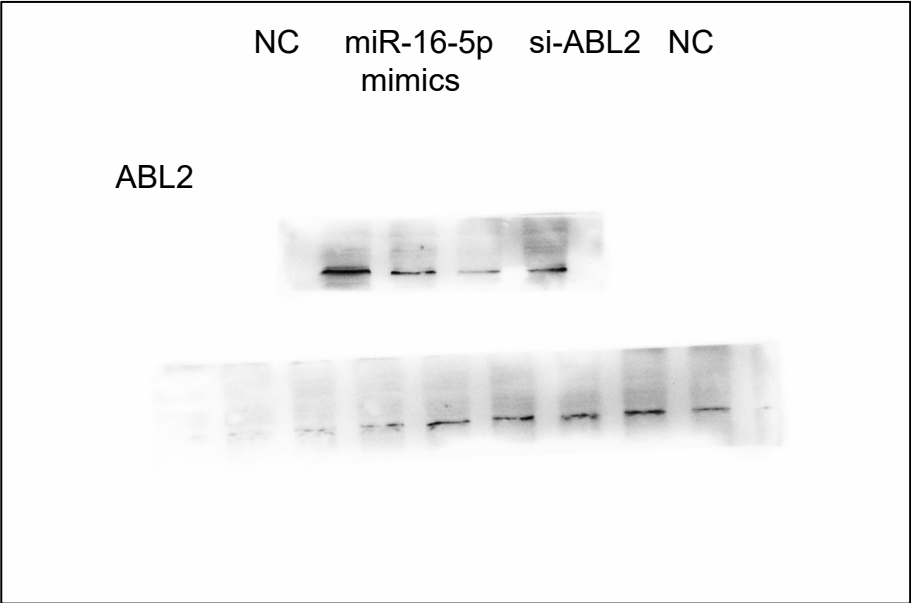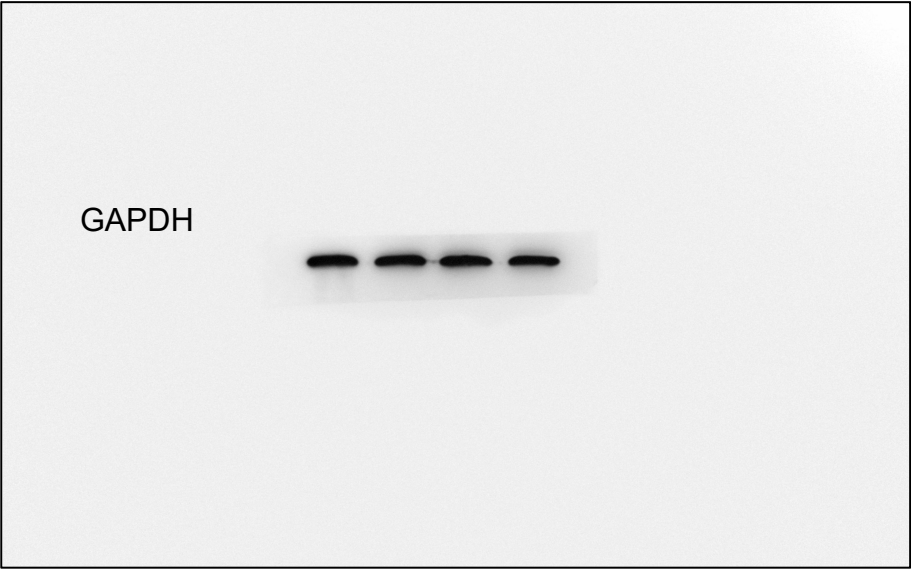

Fig 5C

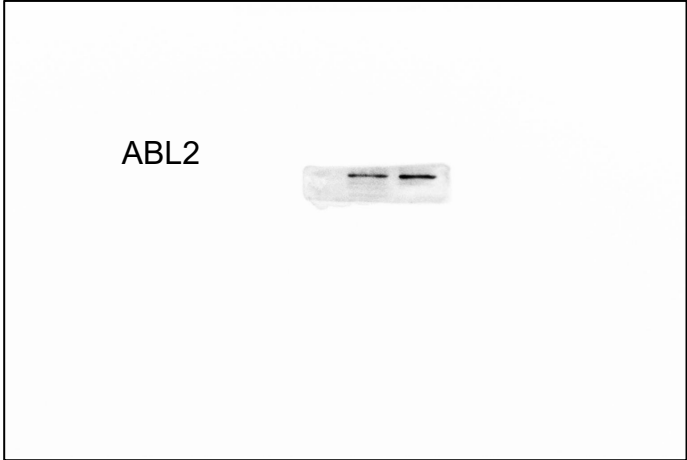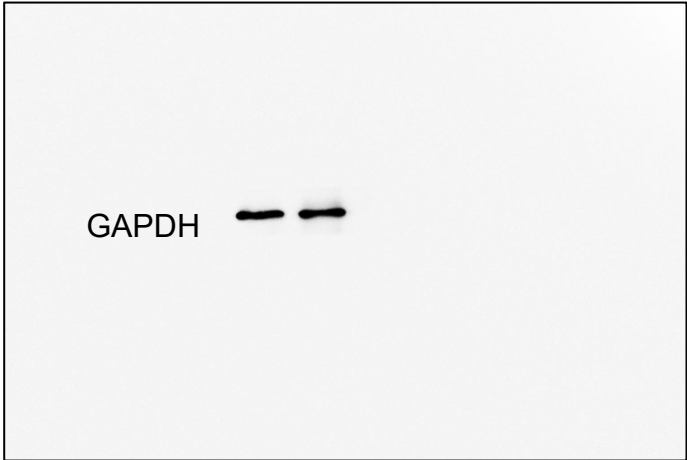



Fig. 5D

pcicR pcicR-circPGD

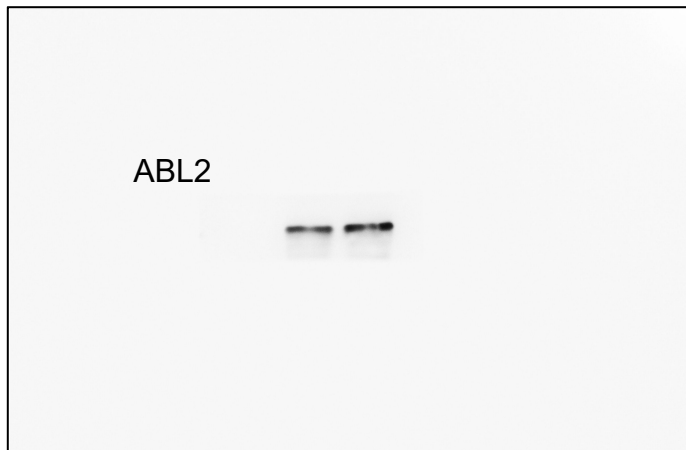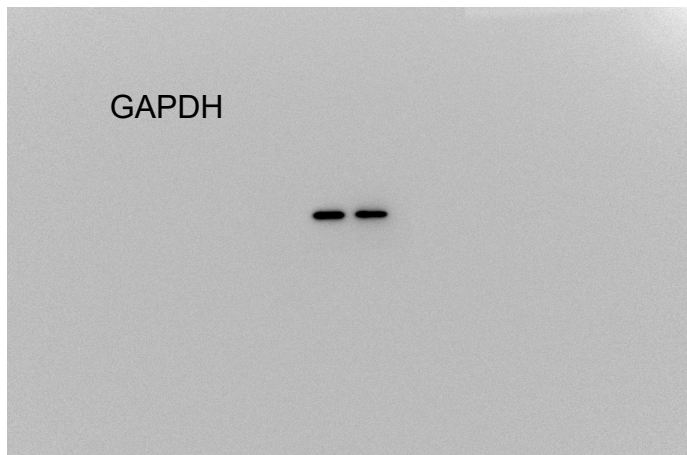

Fig. 5E

NC si-circPGD

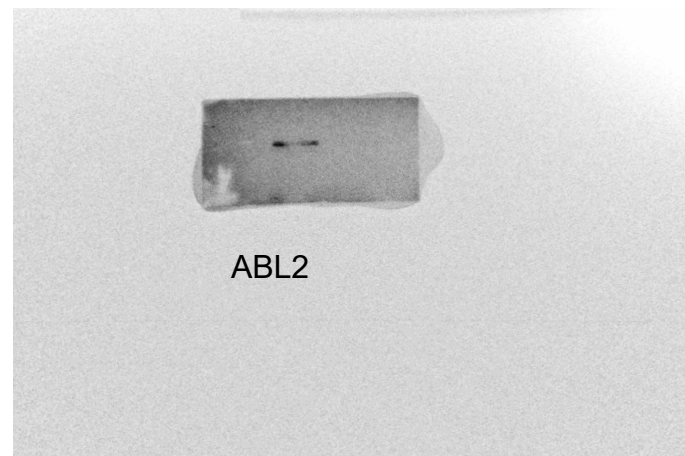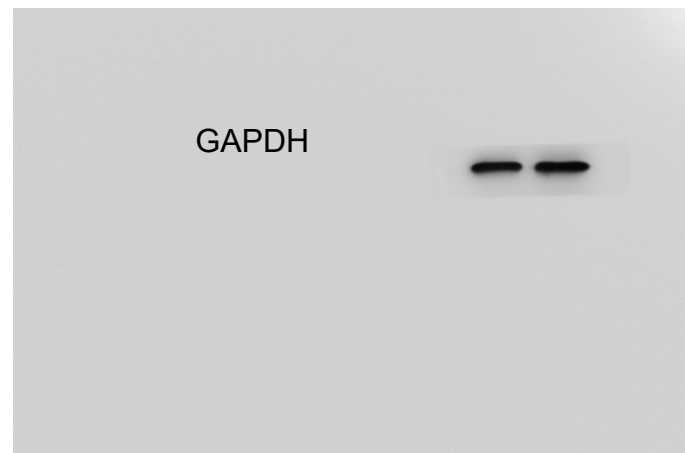

Fig 5I

|                   |   |   |   |   |
|-------------------|---|---|---|---|
| pcicR-3.0         | + | - | + | - |
| pcicR-3.0-circPGD | - | + | - | + |
| miR-16-5p mimics  | - | - | + | + |

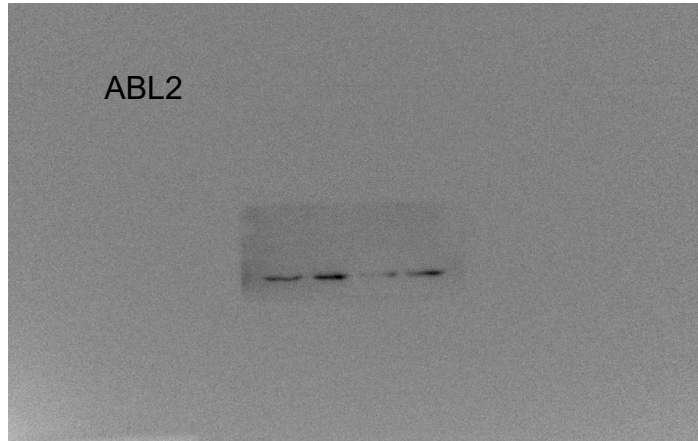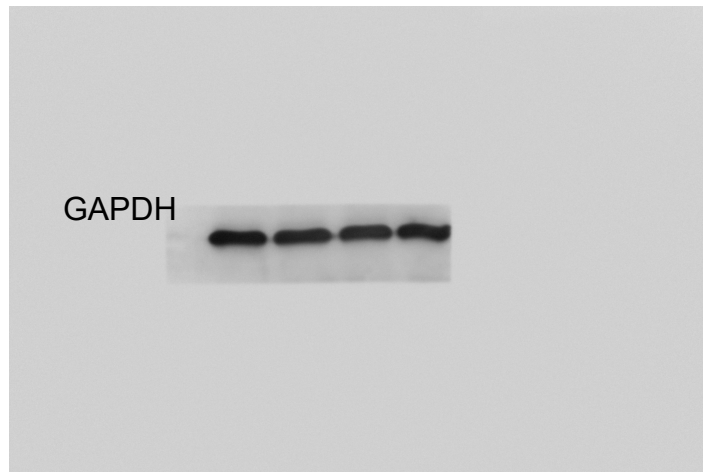

Fig 5J

|                     |   |   |   |   |
|---------------------|---|---|---|---|
| si-circPGD          | - | + | - | + |
| miR-16-5p inhibitor | - | - | + | + |

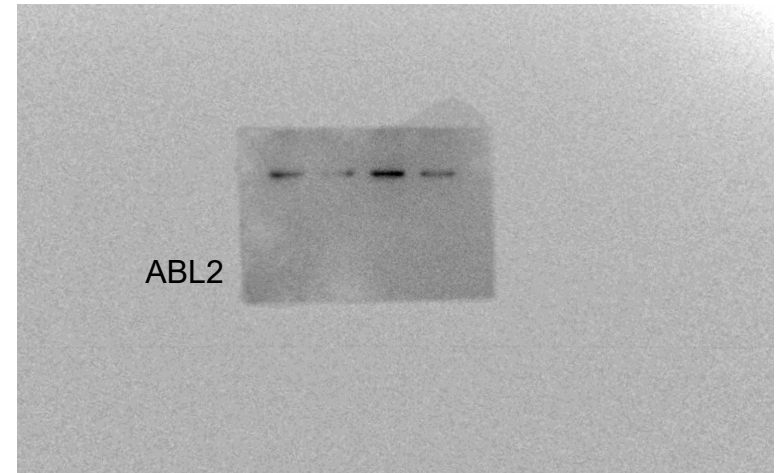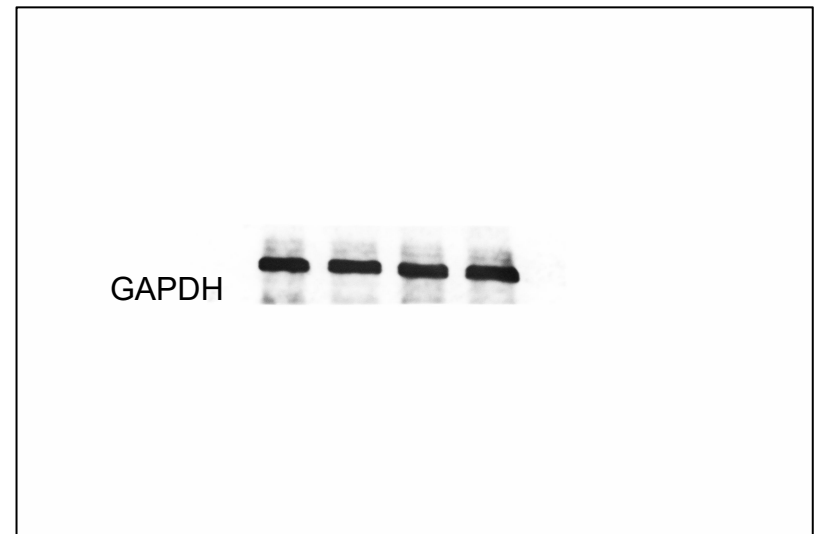

Fig. 50

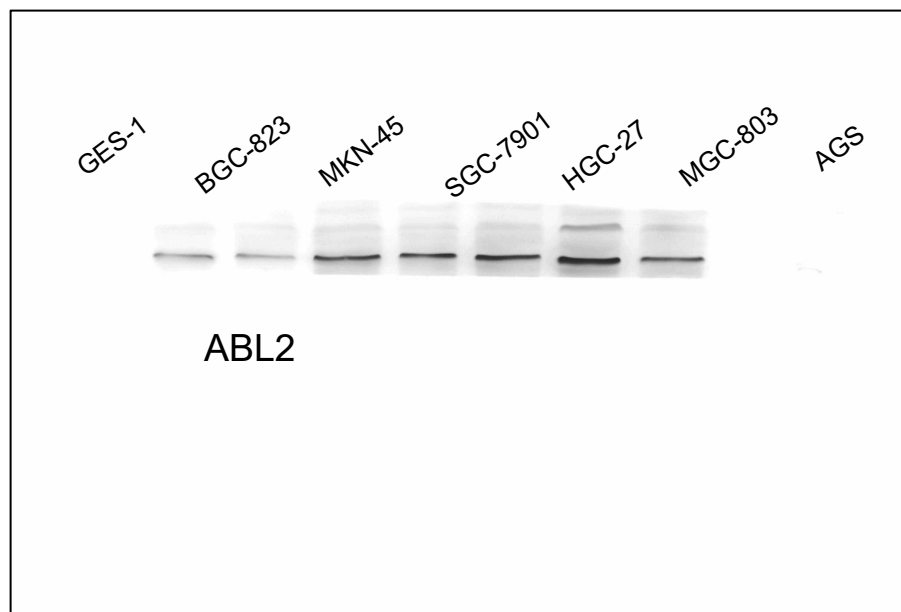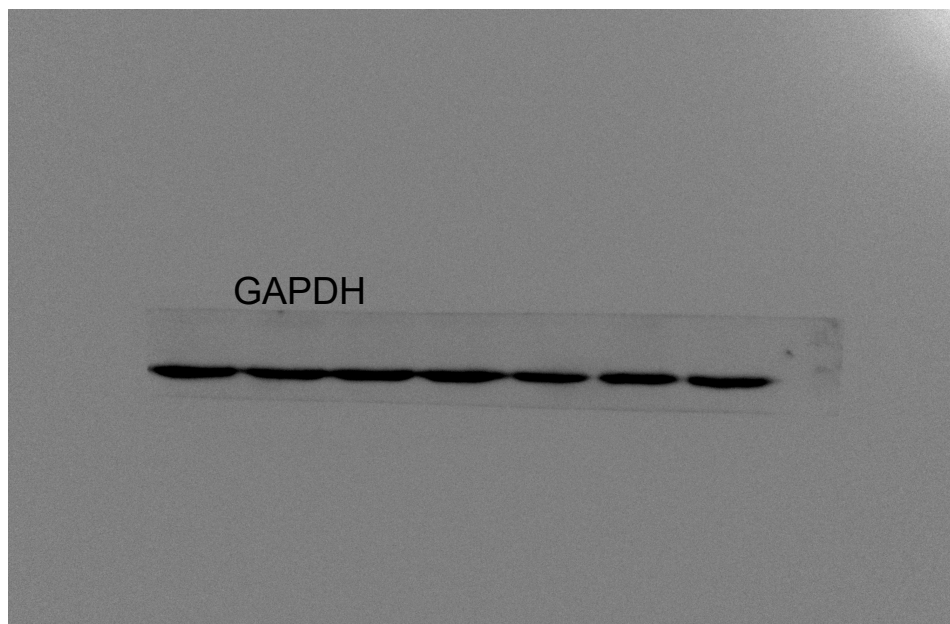

Fig. 6F

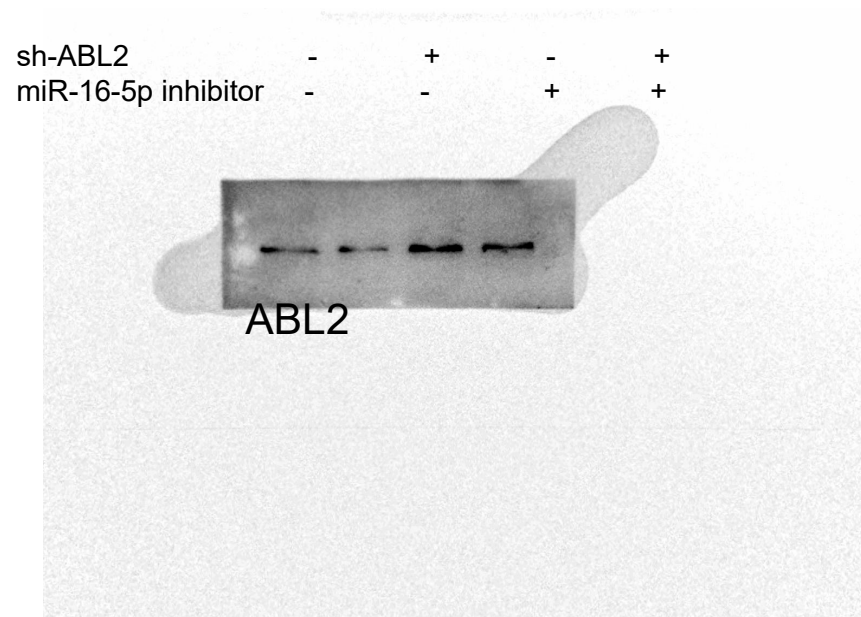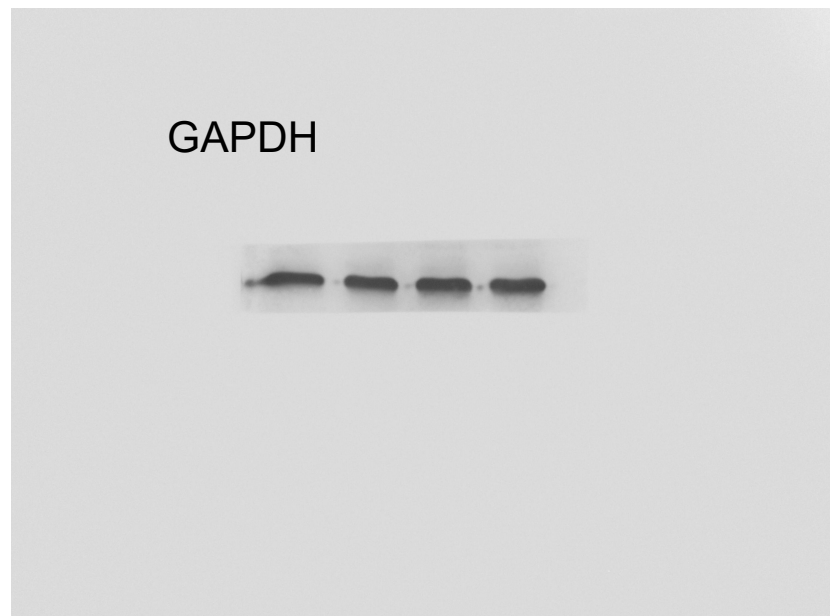

Fig. 6G

|                     |   |   |   |   |
|---------------------|---|---|---|---|
| sh-ABL2             | - | + | - | + |
| miR-16-5p inhibitor | - | - | + | + |

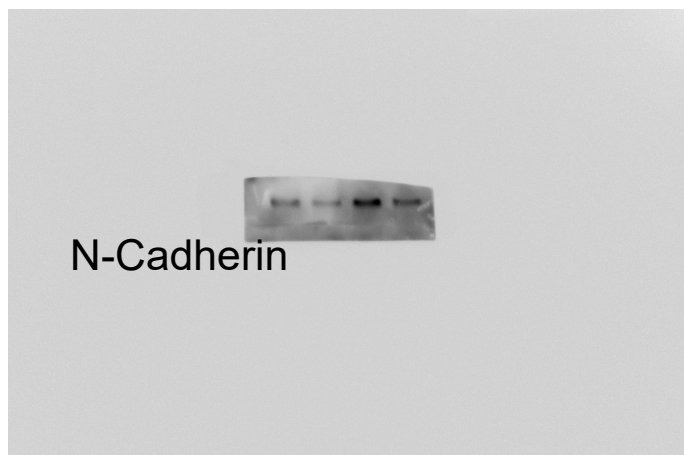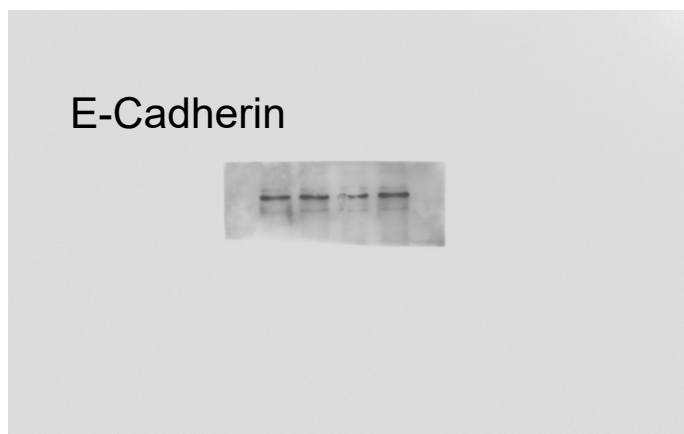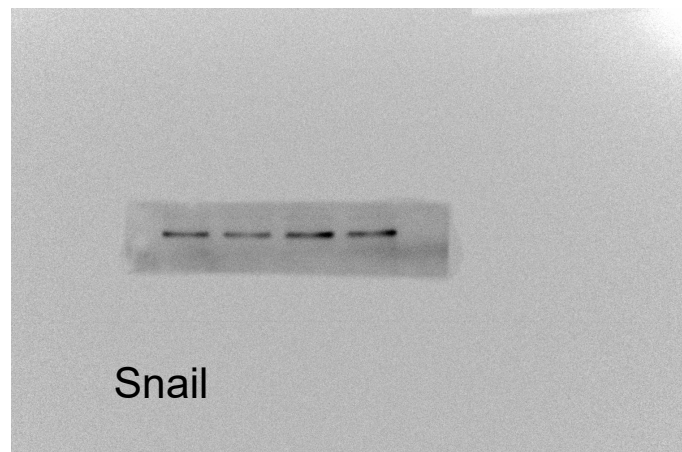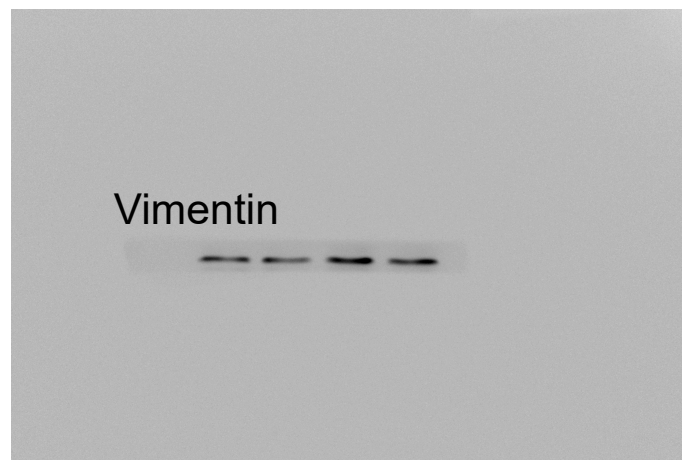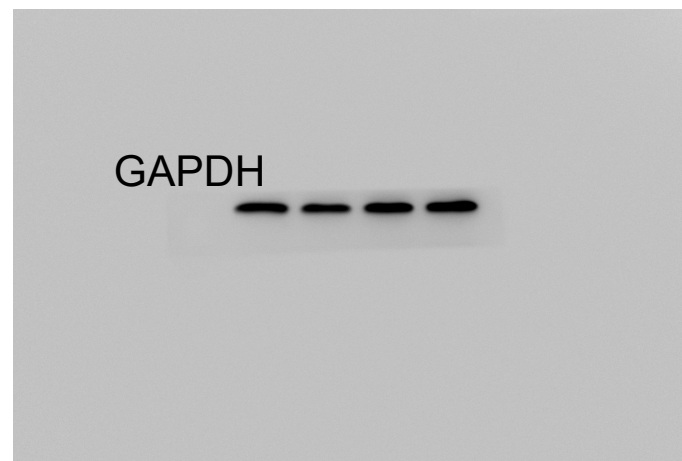

Fig. 6H

|                     |   |   |   |   |
|---------------------|---|---|---|---|
| sh-ABL2             | - | + | - | + |
| miR-16-5p inhibitor | - | - | + | + |

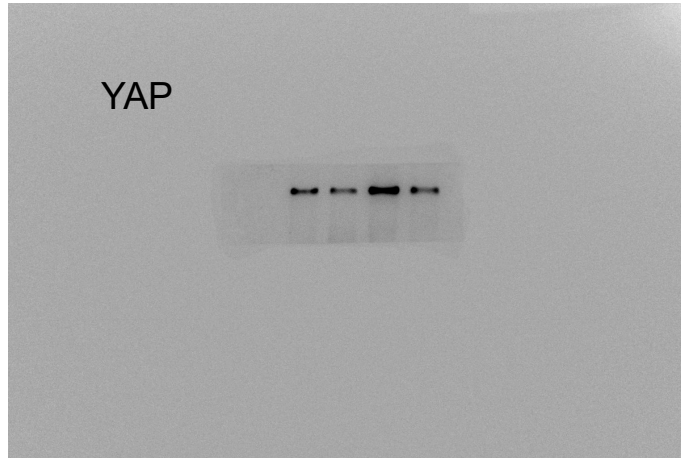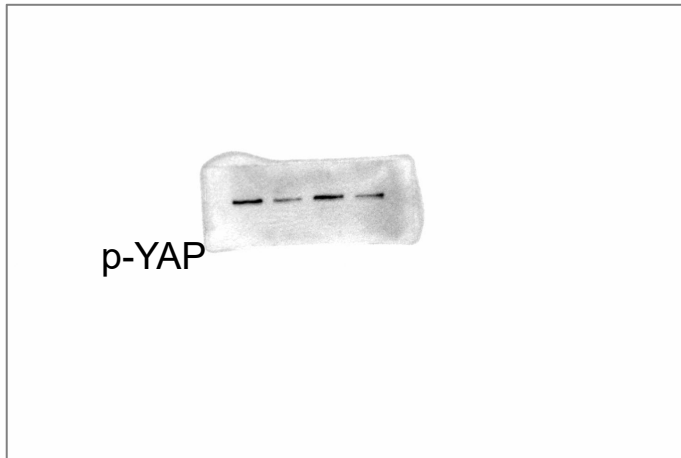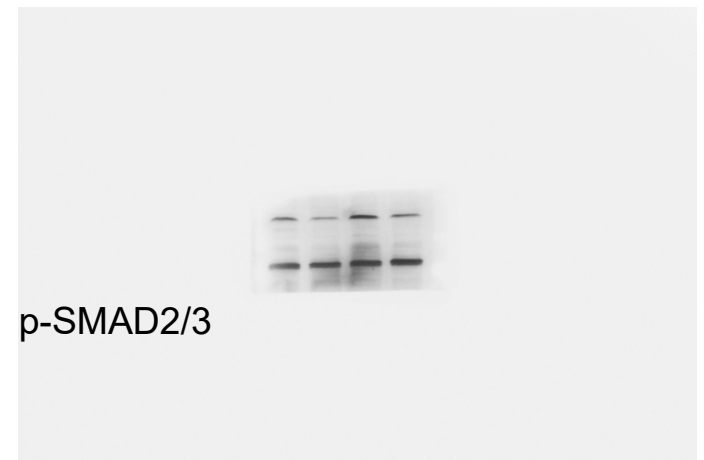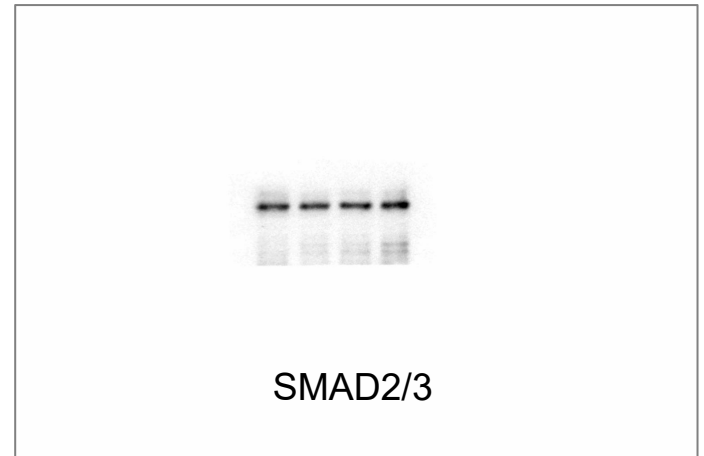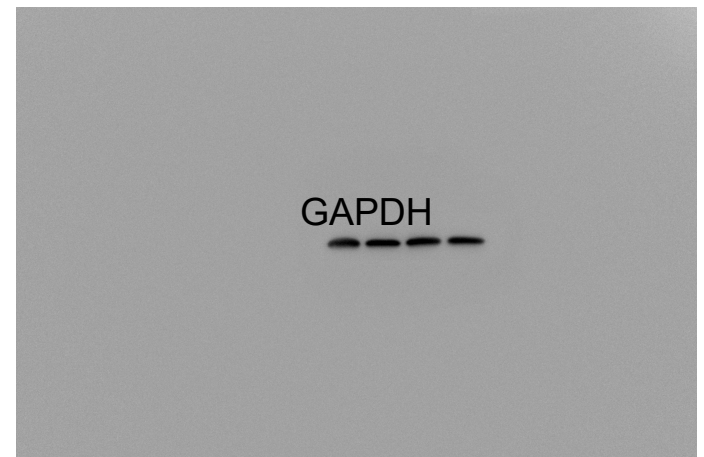

Fig. 6L

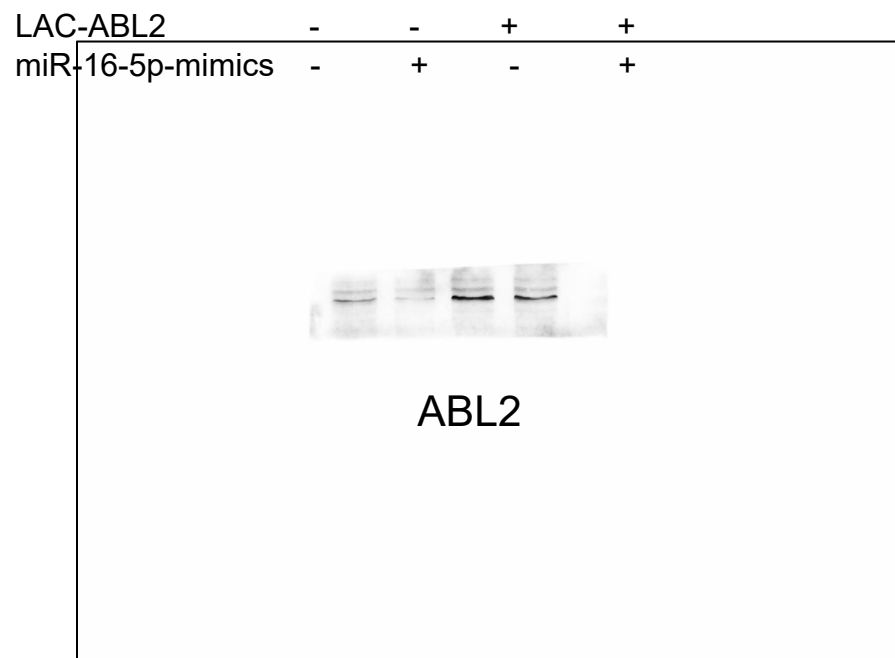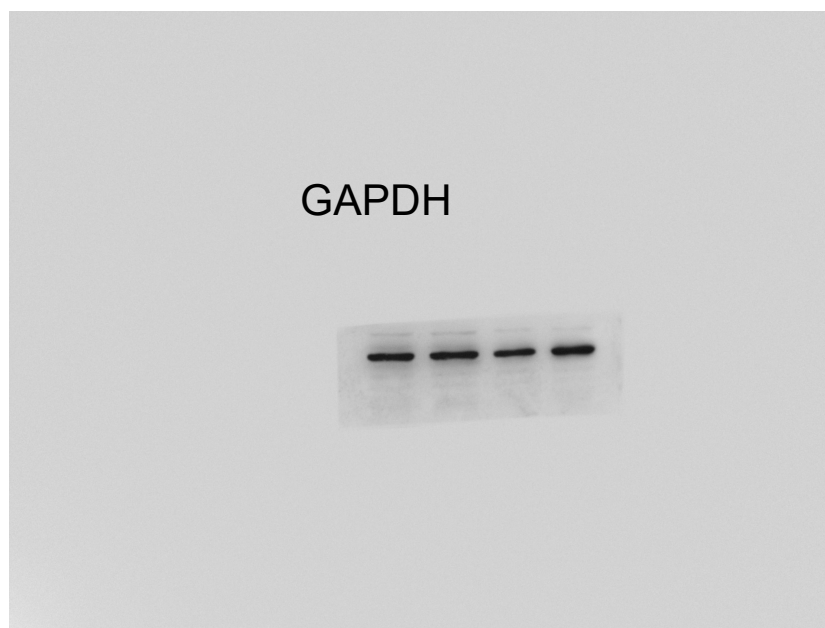

Fig. 6M

|                  |   |   |   |   |
|------------------|---|---|---|---|
| LAC-ABL2         | - | - | + | + |
| miR-16-5p-mimics | - | + | - | + |

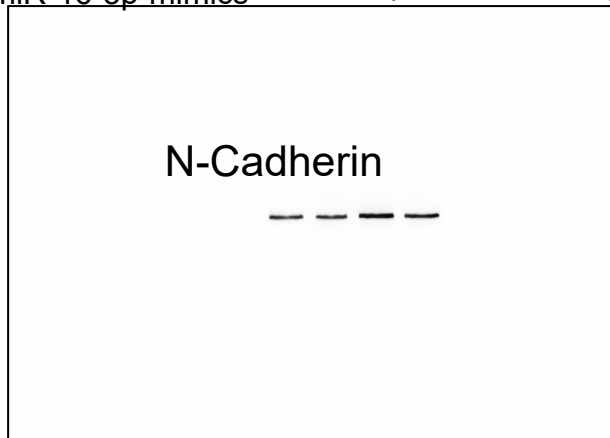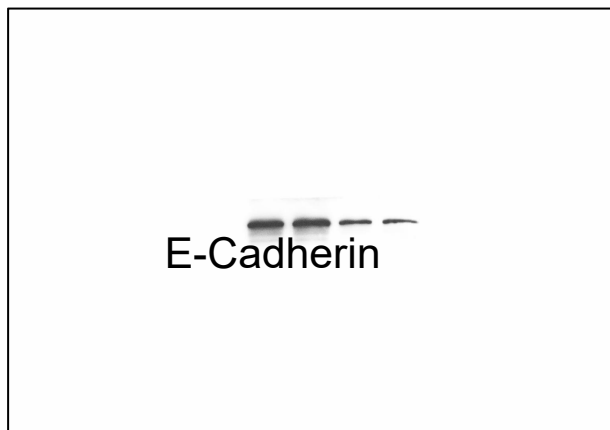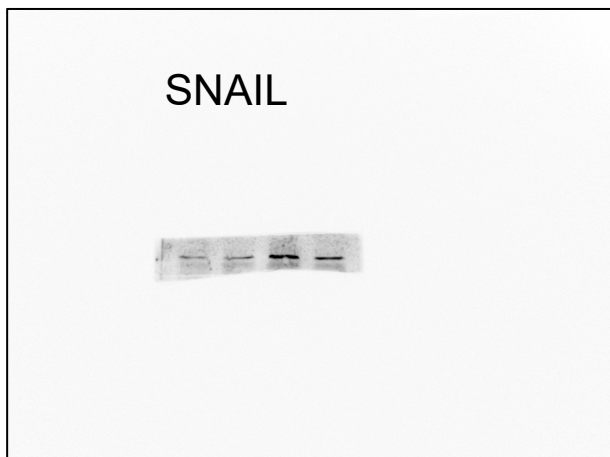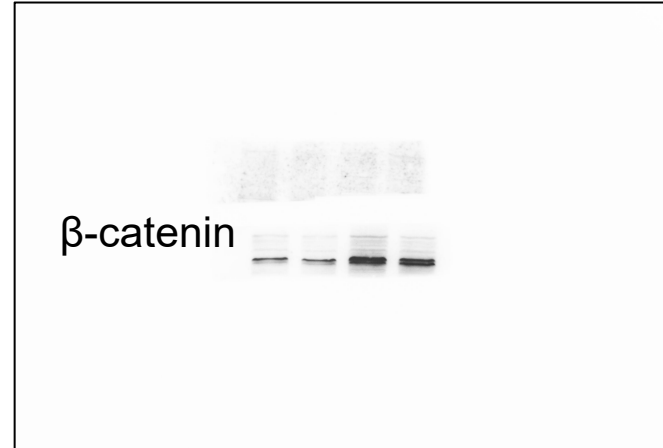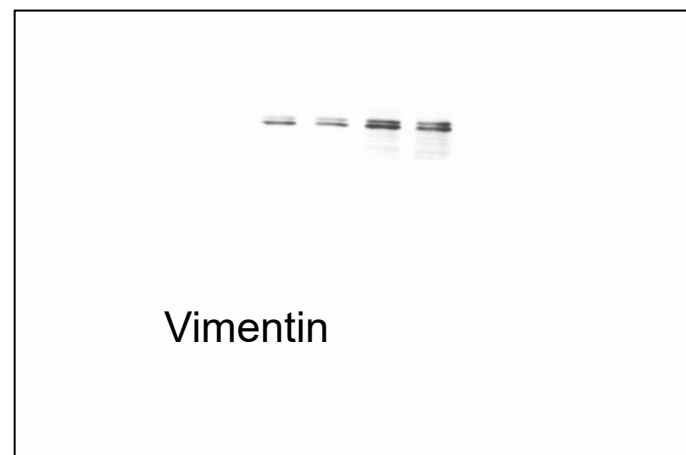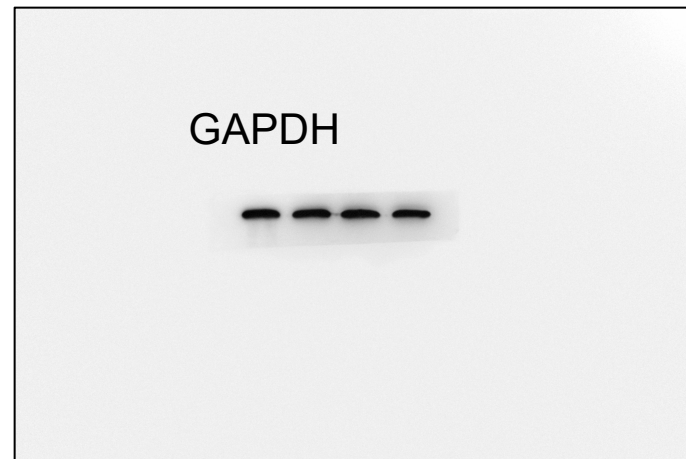



Fig. 6N

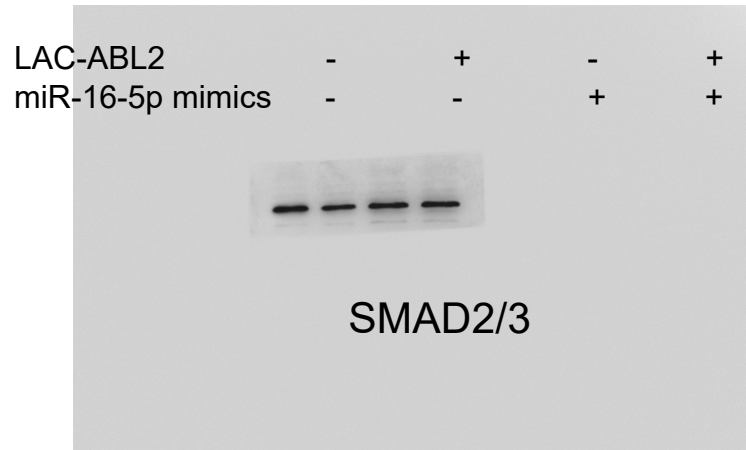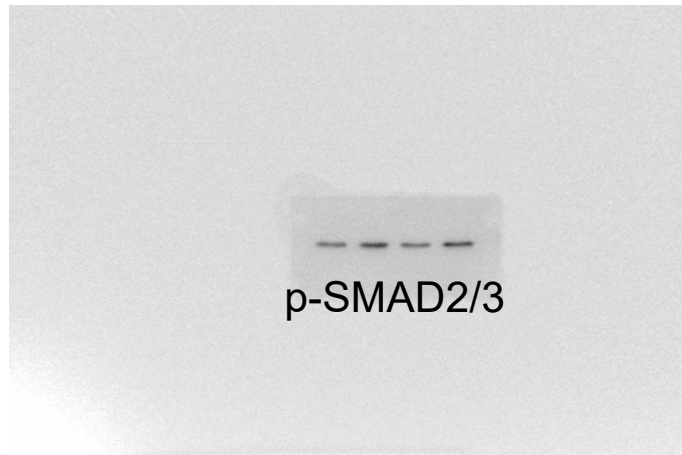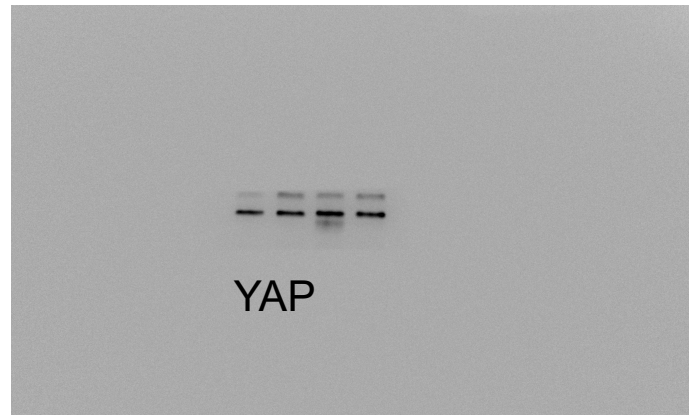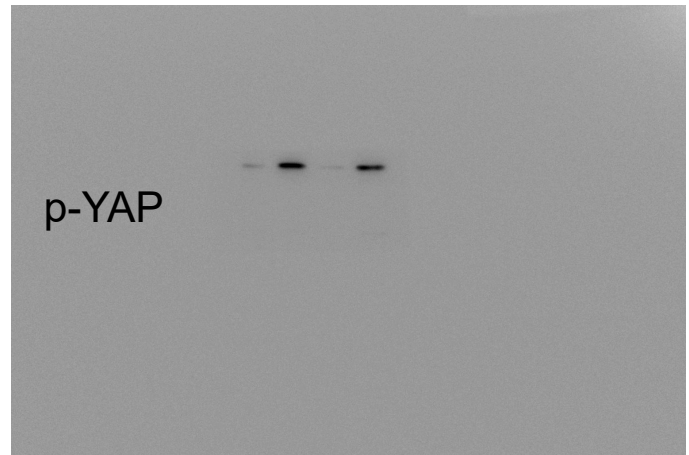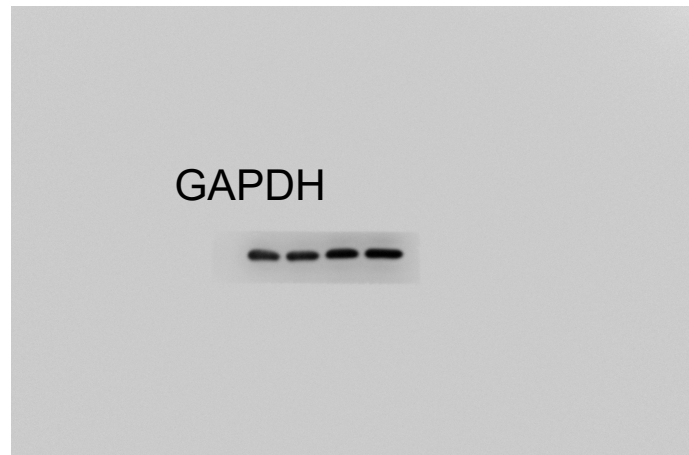

Fig. 7D

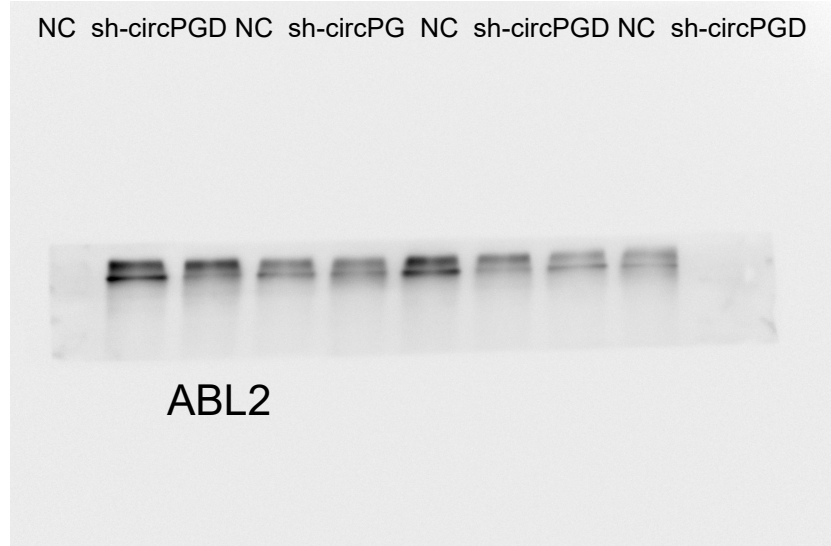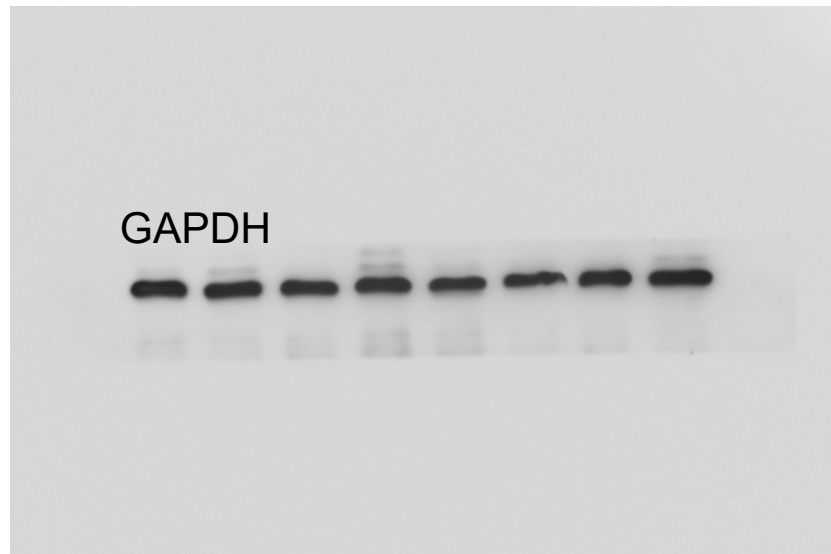

Fig. 7E

NC sh-circPGD NC sh-circPGD NC sh-circPGD NC sh-circPGD

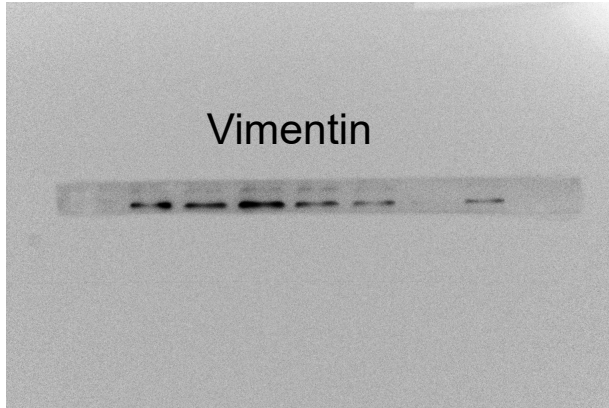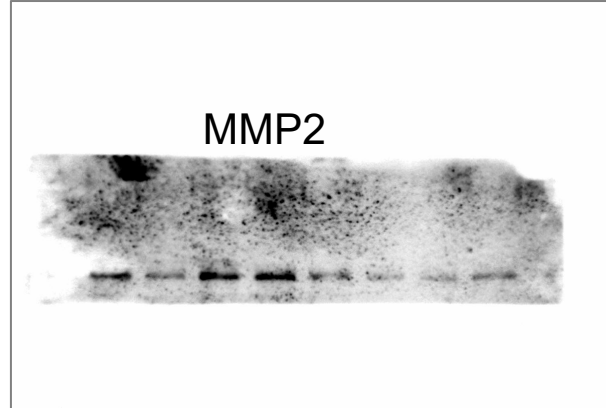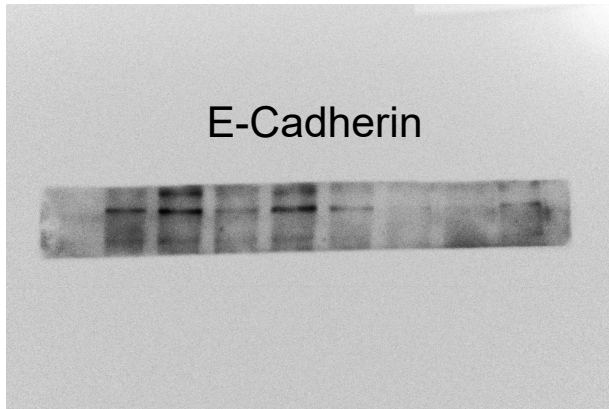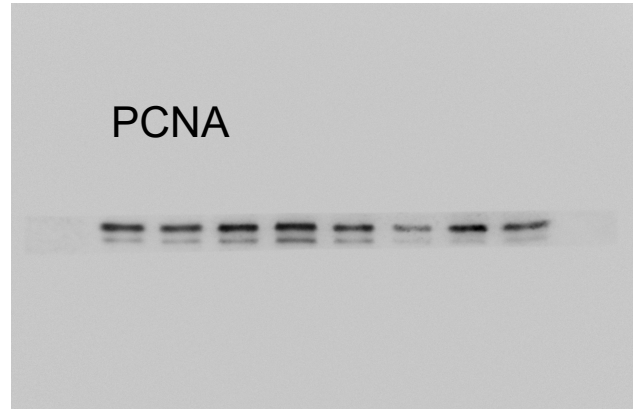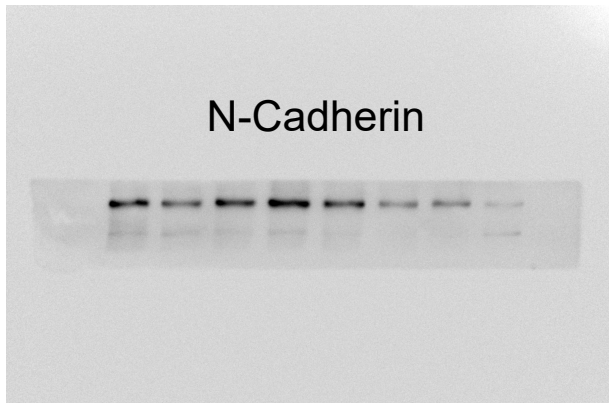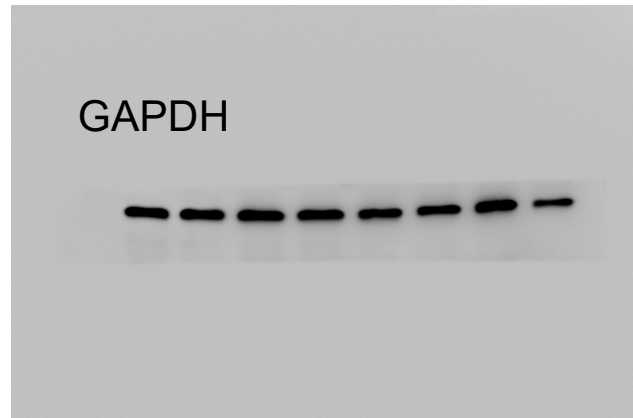

Fig. 7G

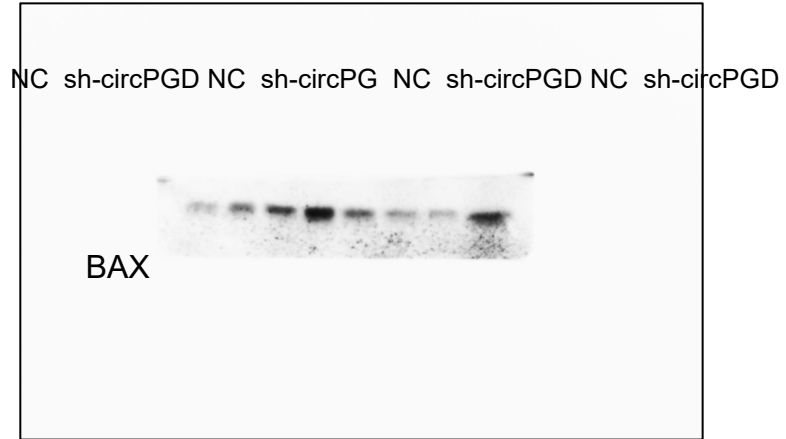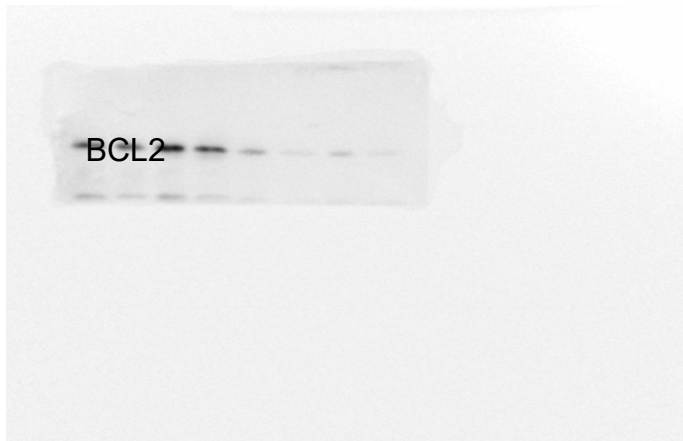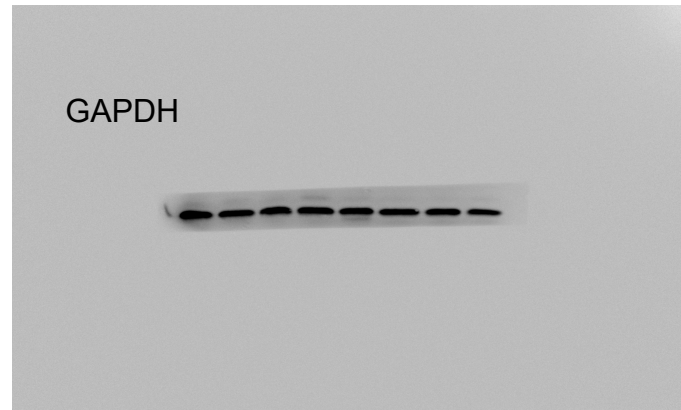

Fig. 7H

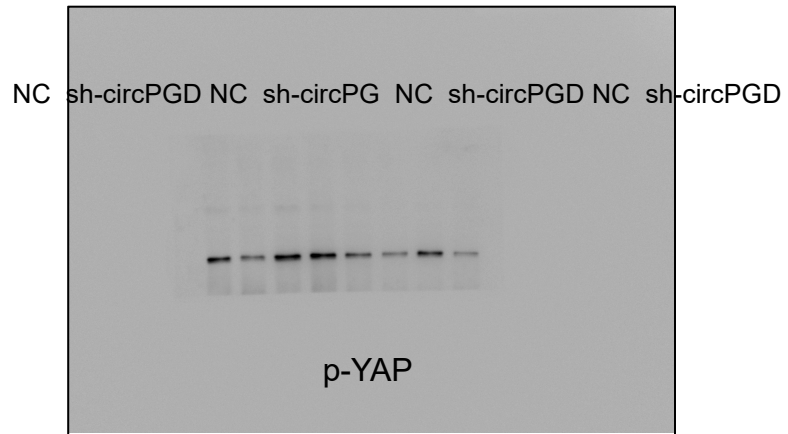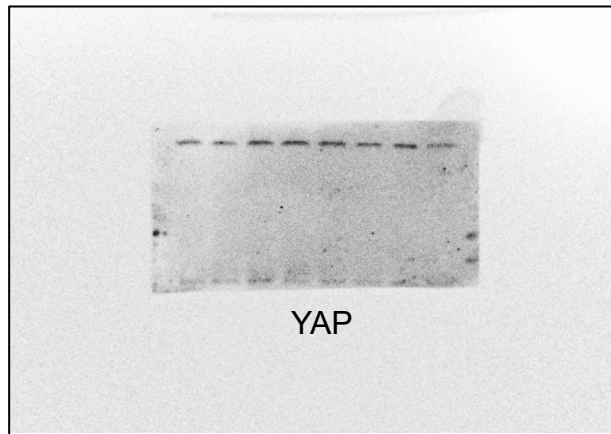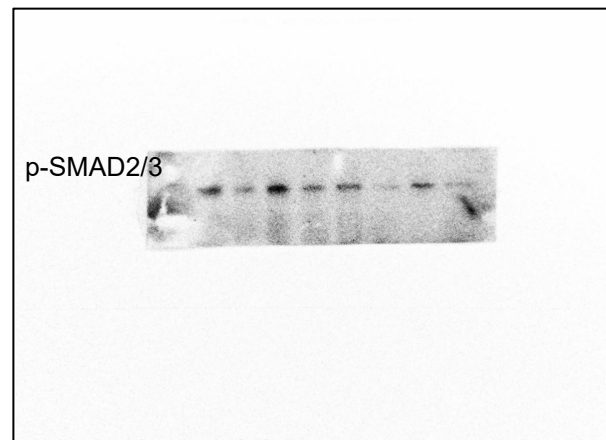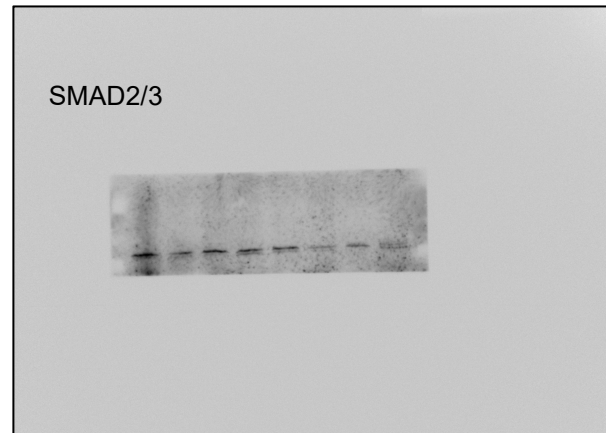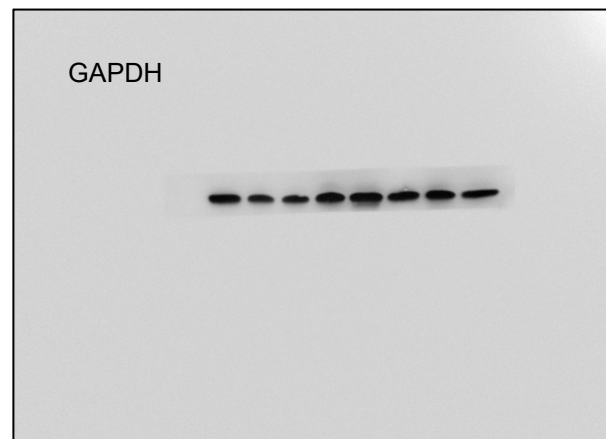

Fig. 7L

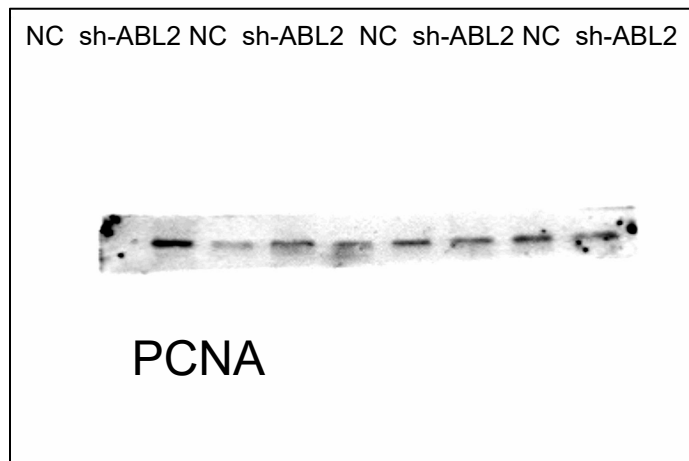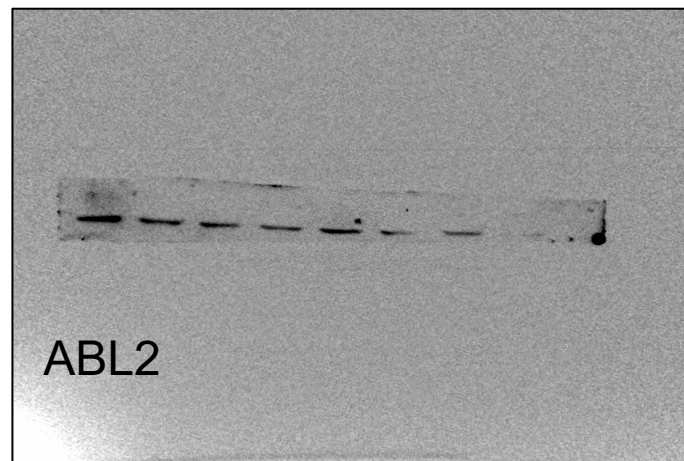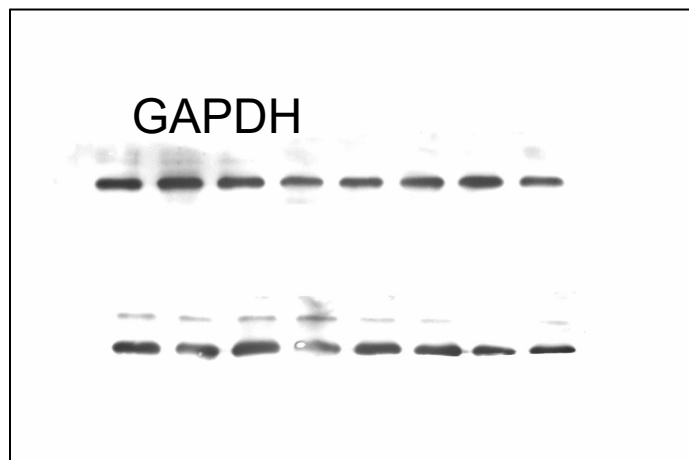

Fig. 8B

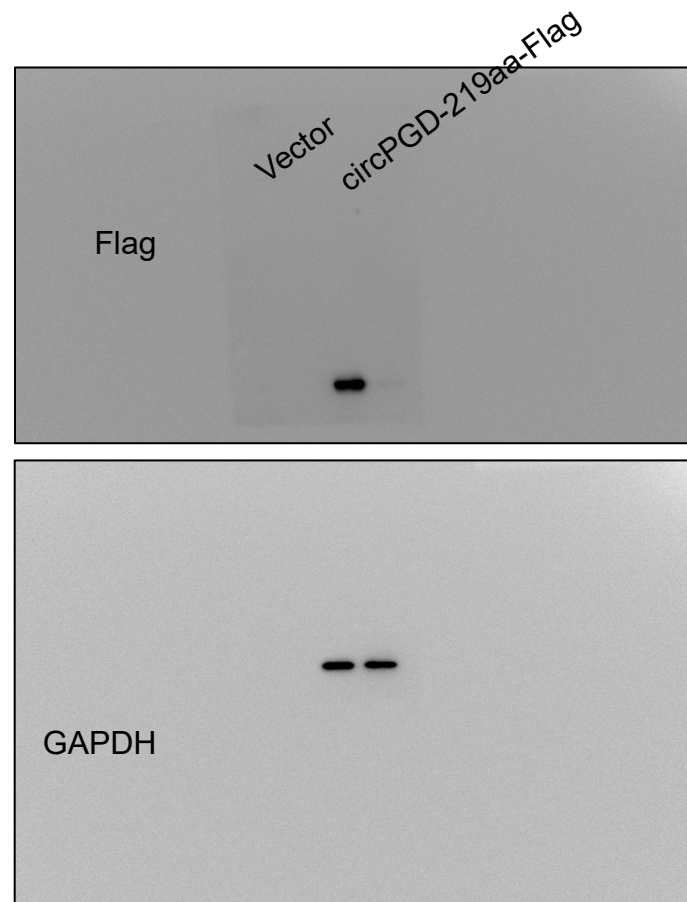

Fig. 8C

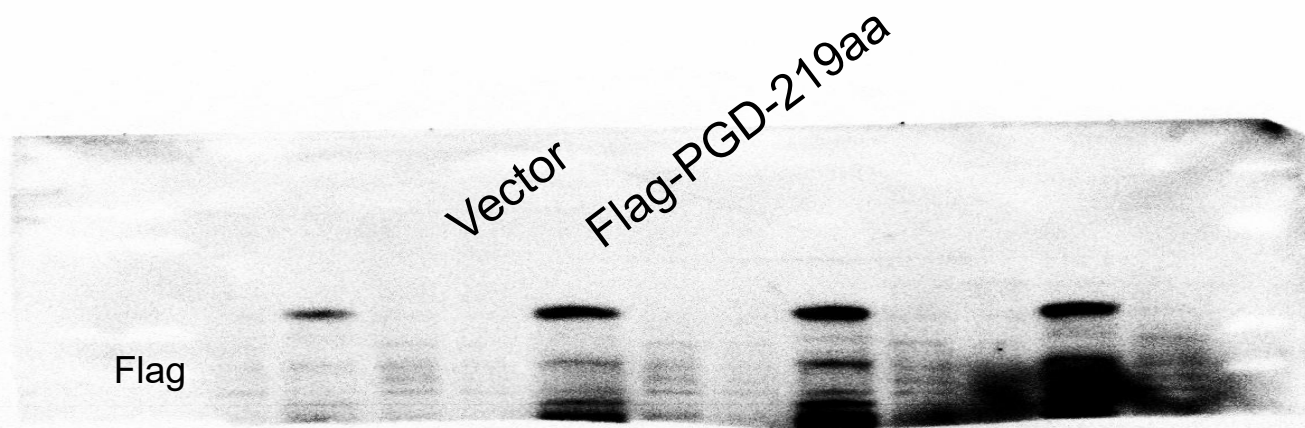



Fig. 8J

Vector  
circPGD-219aa-Flag  
circPGD-219aa-mut-Flag  
PGD-219aa-Flag

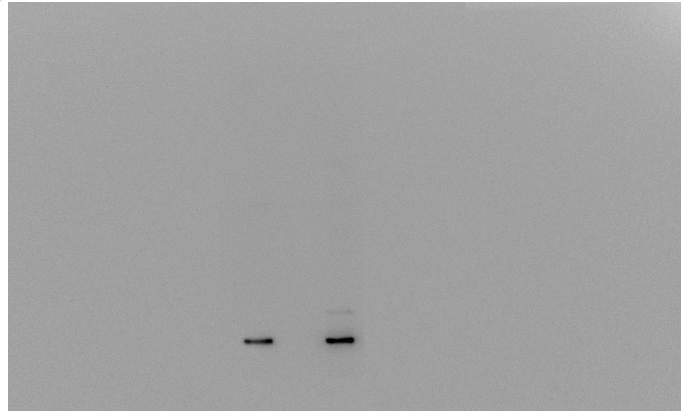

Flag

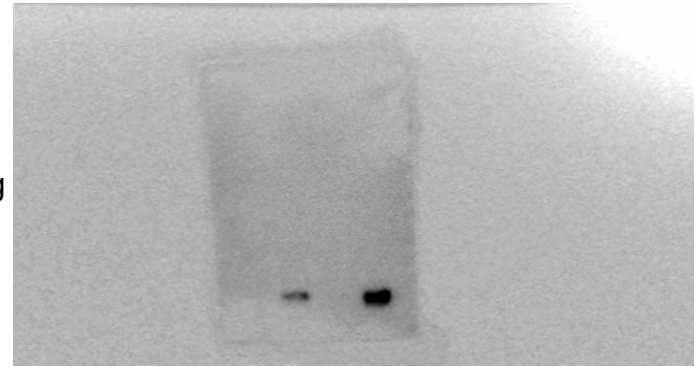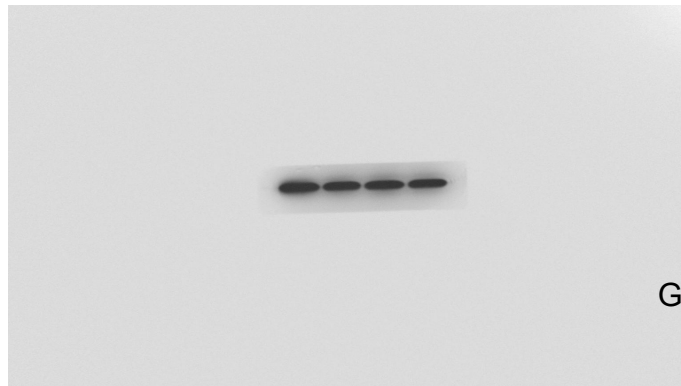

GAPDH

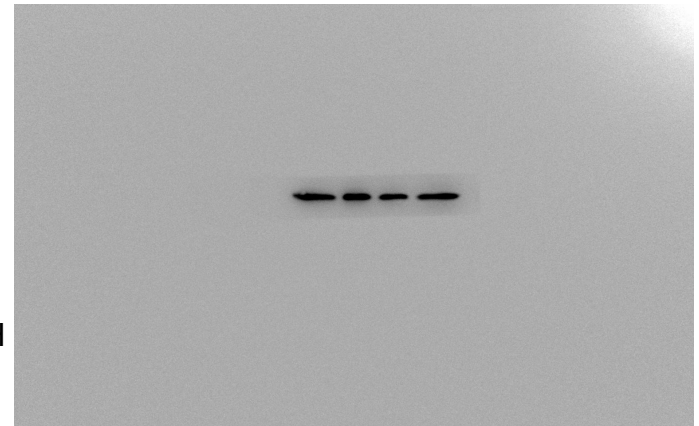

MGC-803

BGC-823

Fig. 8P MGC-803 cells

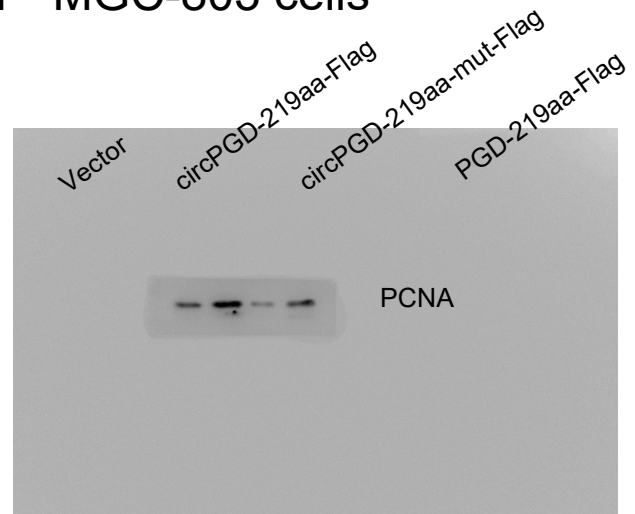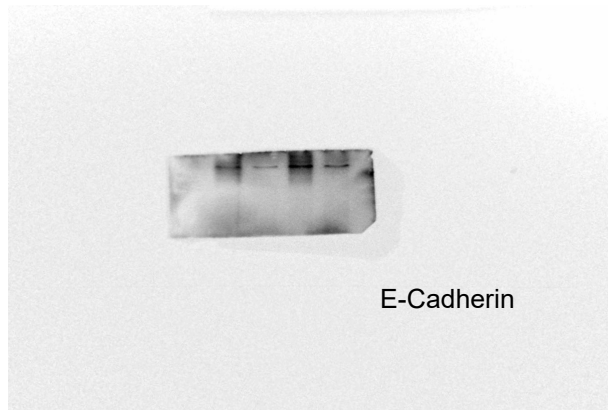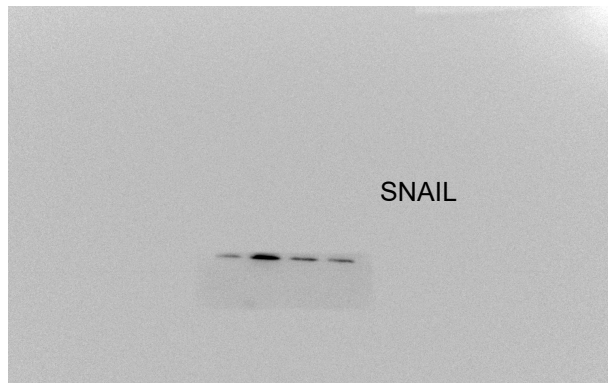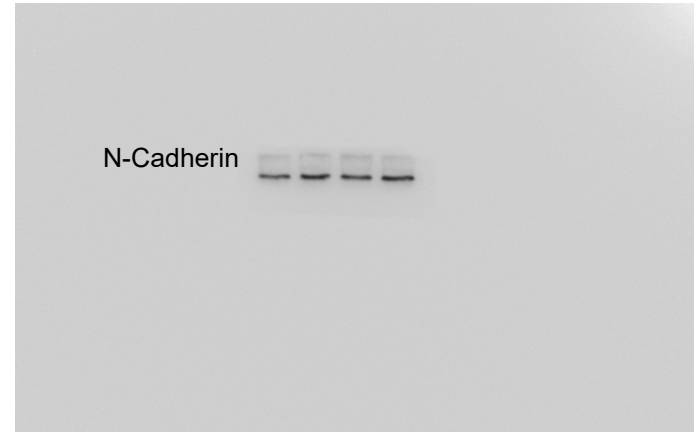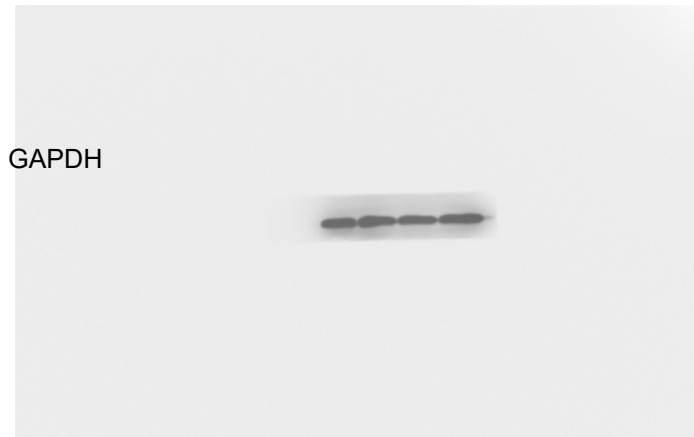

Fig. 8P BGC-823 cells

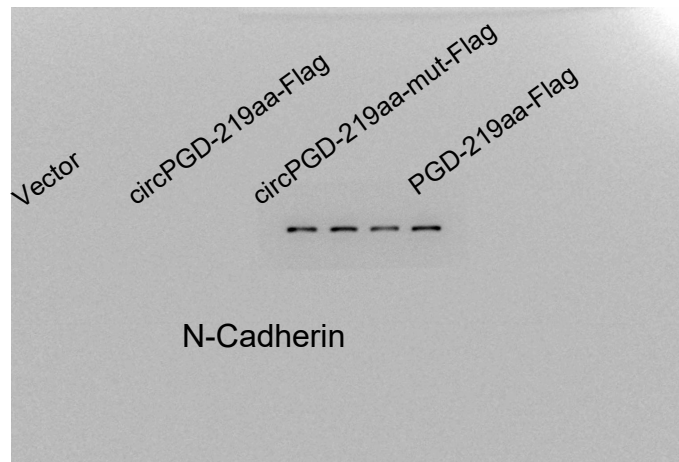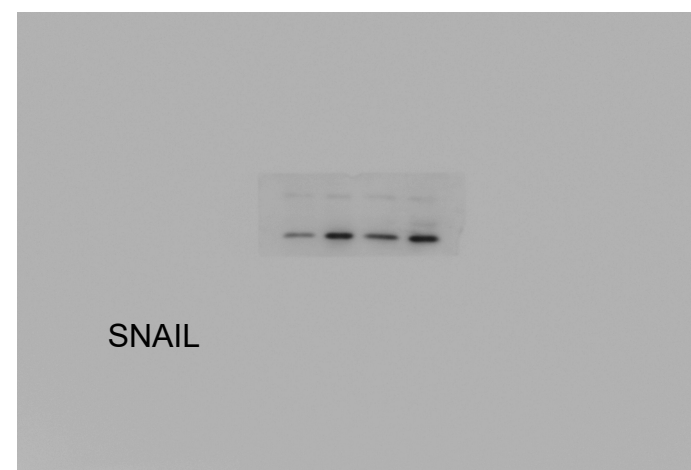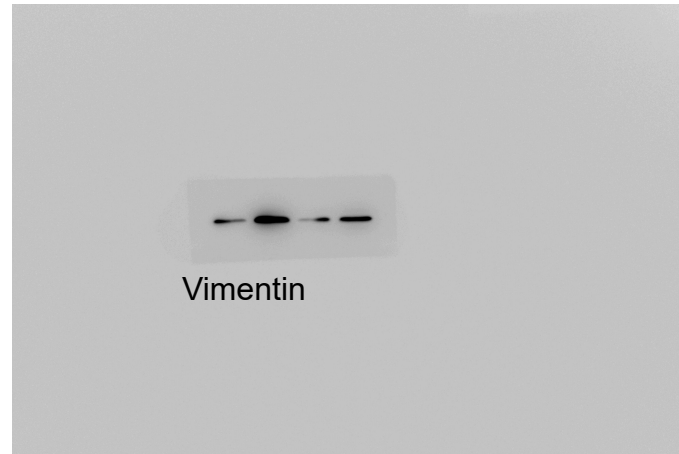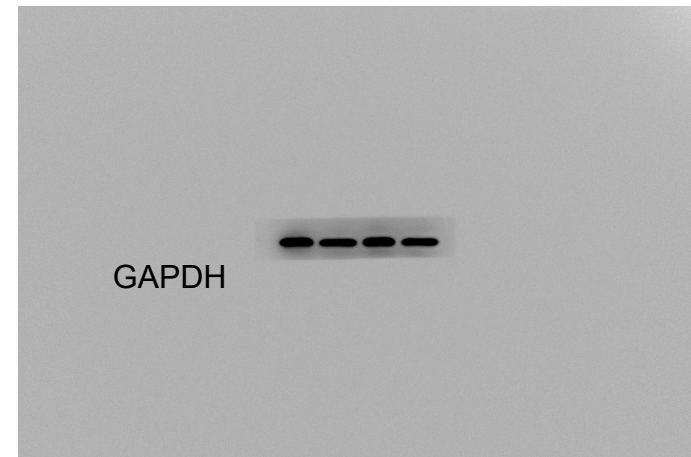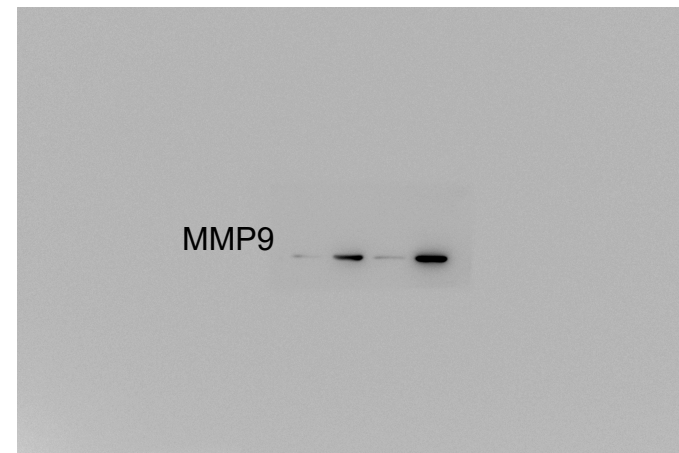

Fig. 8Q MGC-803 cells

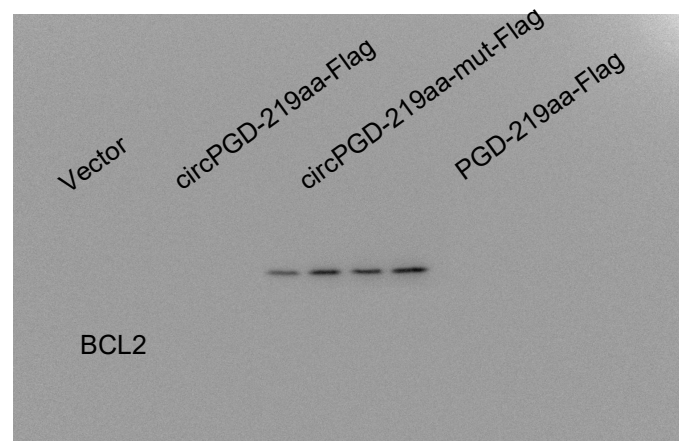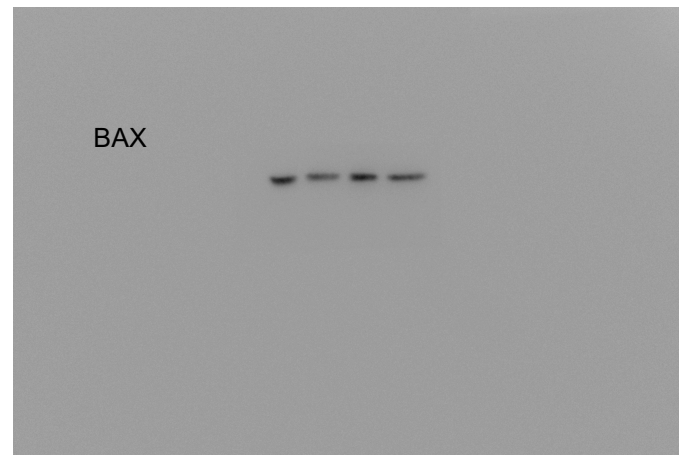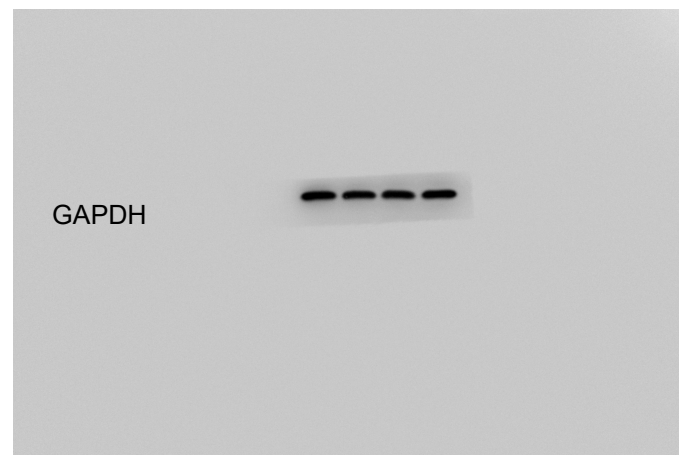

Fig.8Q BGC-823 cells

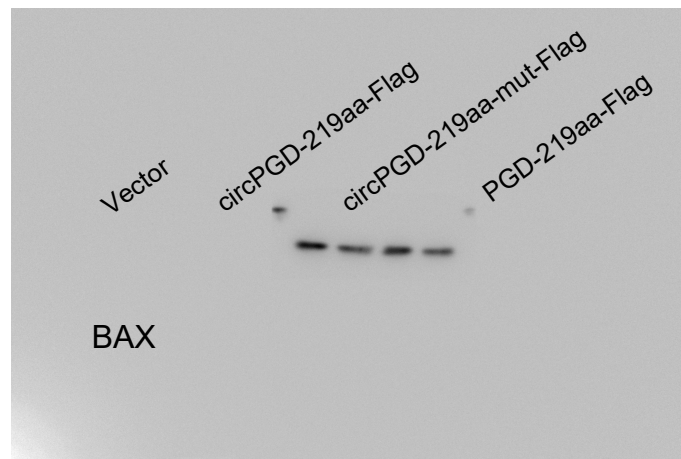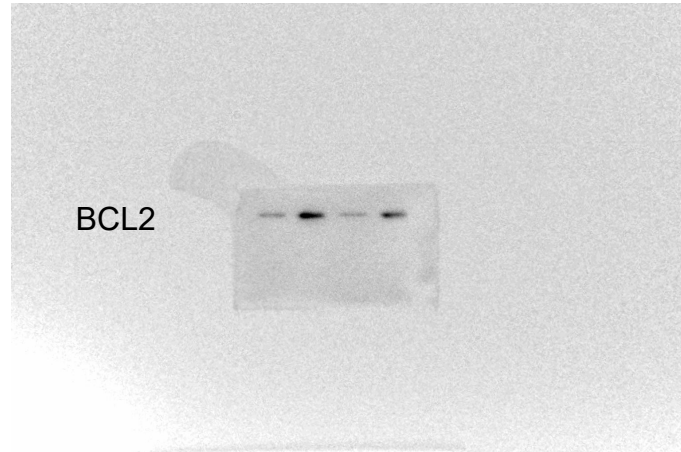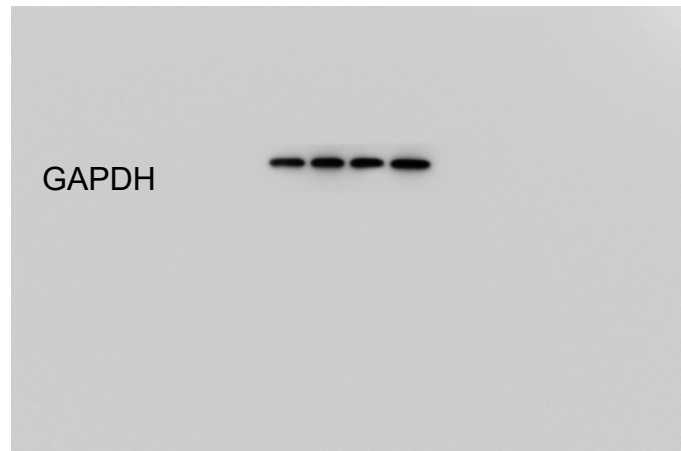

Fig. 8R MGC-803 cells

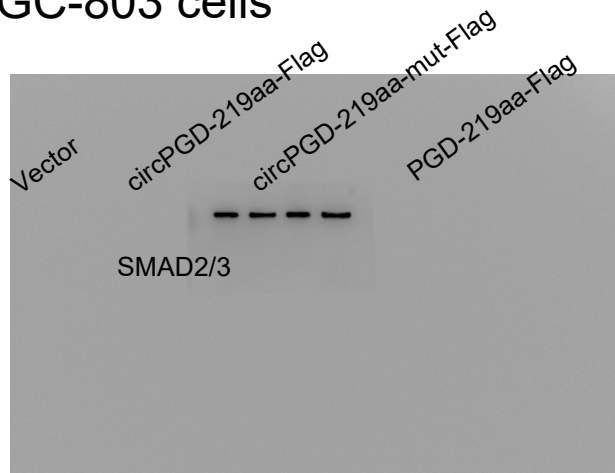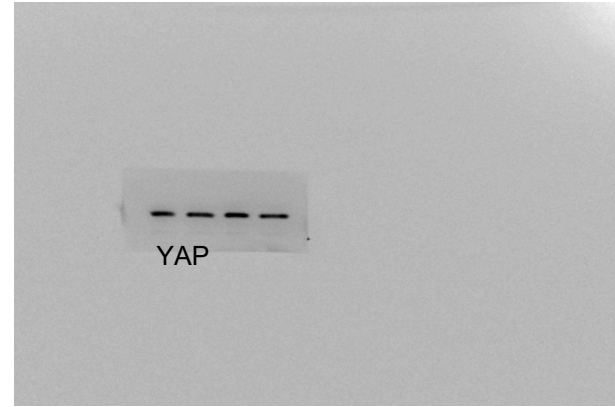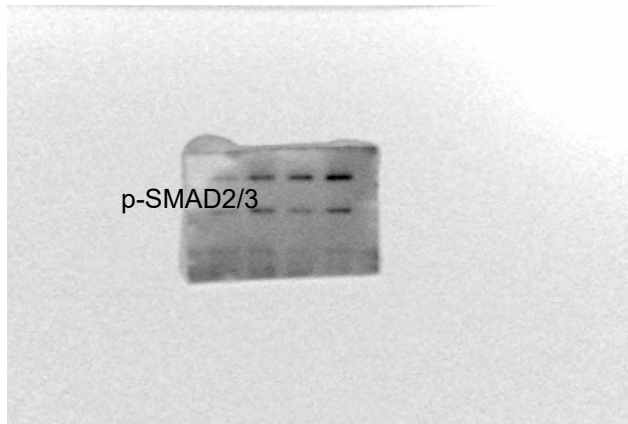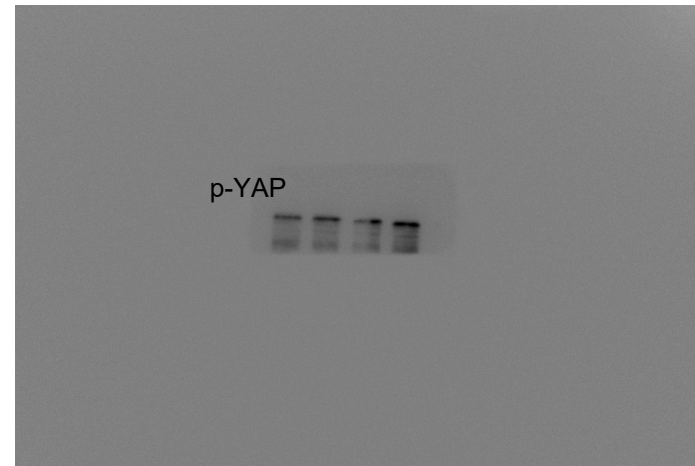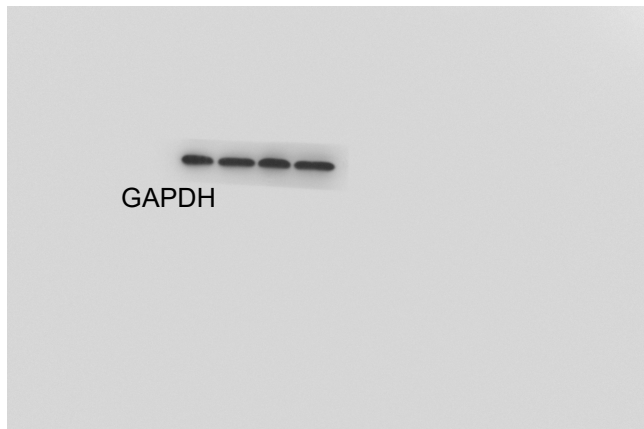

Fig. 8R BGC-823 cells

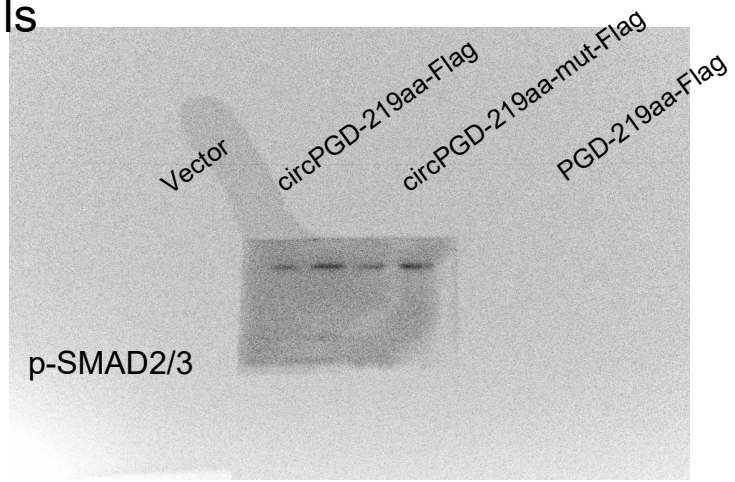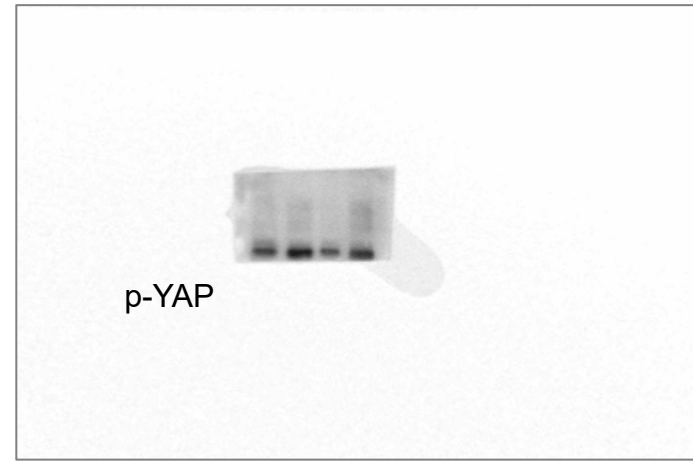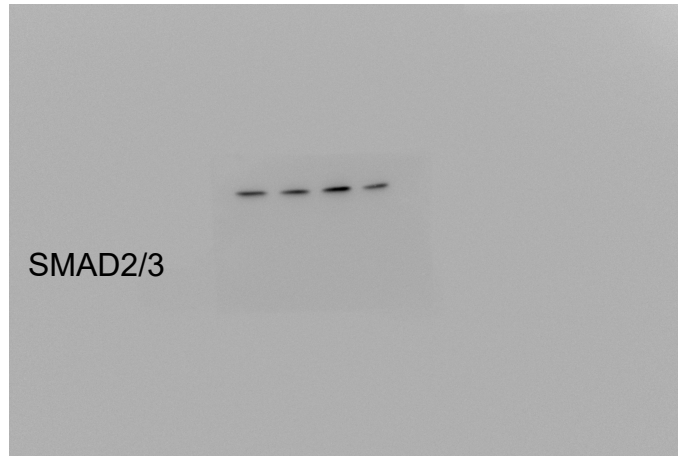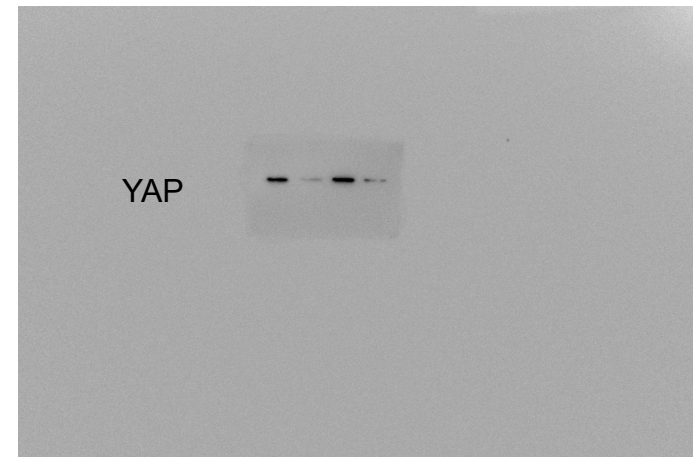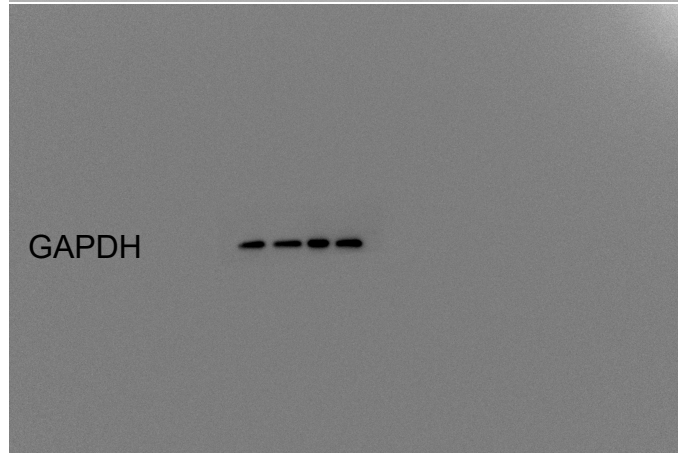

Fig. S4

Control si-ABL2

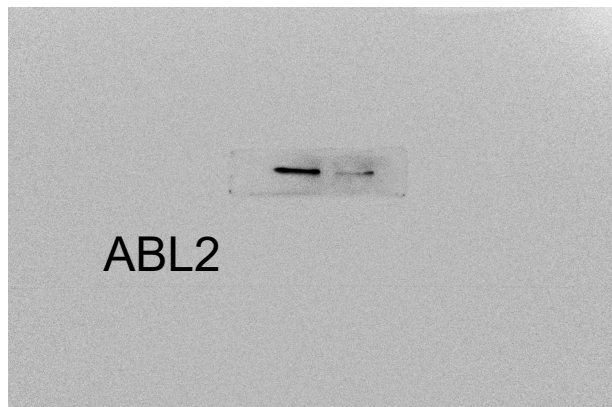

Control LAC-ABL2

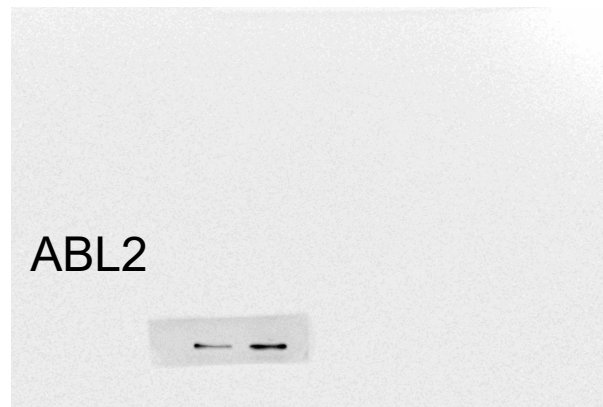

GAPDH

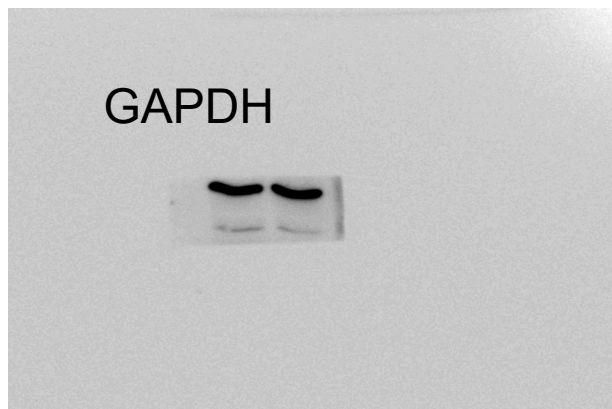

GAPDH

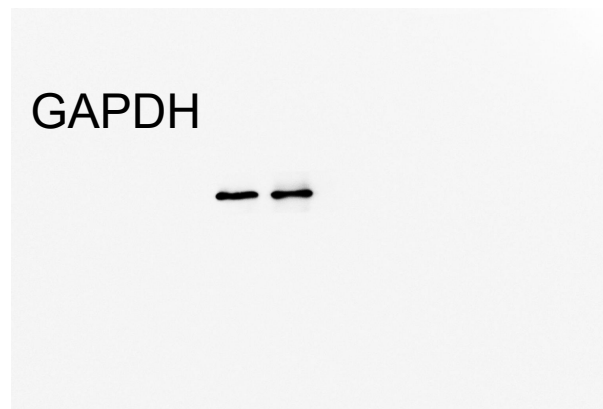

Supplement: 41420_2022_1177_MOESM10_ESM.pdf [file 41420_2022_1177_MOESM10_ESM.pdf]
